# Supplementary material
Source: MDPI journal article supplement (https://www.mdpi.com/2073-4344/12/9/961)
Supplement: s1 [file s1 › catalysts-1881423-supplementary.pdf]

Supplementary Information  
for

# LLDPE-like Polymers Accessible via Ethylene Homopolymerization using Nitro-Appended 2-(Arylimino)Pyridine-Nickel Catalysts

Desalegn Demise Sage<sup>1,2</sup>, Qiuyue Zhang<sup>1</sup>, Ming Liu<sup>1</sup>, Gregory A. Solan<sup>1,3\*</sup>, Yang Sun<sup>1</sup> and Wen-Hua Sun<sup>1,2\*</sup>

<sup>1</sup> Key Laboratory of Engineering Plastics and Beijing National Laboratory for Molecular Sciences, Institute of Chemistry Chinese Academy of Sciences, Beijing 100190, China; desdem0028@iccas.ac.cn (D.D.S.); zhangqiuyue@iccas.ac.cn (Q.Z.); liuming@iccas.ac.cn (M.L.); sy0471103@iccas.ac.cn (Y.S.)

<sup>2</sup> International School, University of Chinese Academy of Sciences, Beijing 100049, China

<sup>3</sup> Department of Chemistry, University of Leicester, University Road, Leicester LE1 7RH, UK

\* Correspondence: gas8@leicester.ac.uk (G.A.S.); Tel.: +44-(0)116-2522096; whsun@iccas.ac.cn (W.-H.S.); Tel.: +86-10-6255-7955

## Table of contents

|                                                                                                                                                                                                                                                                                                                                                                                     | Page |
|-------------------------------------------------------------------------------------------------------------------------------------------------------------------------------------------------------------------------------------------------------------------------------------------------------------------------------------------------------------------------------------|------|
| • <b>Scheme S1</b> Synthetic route to anilines <b>A3</b> and <b>A4</b> .                                                                                                                                                                                                                                                                                                            | S2   |
| • <b>Scheme S2</b> Synthetic route to 2,6-diisopropyl-3-nitro-4-(4,4-difluorobenzhydryl)aniline ( <b>A5</b> ).                                                                                                                                                                                                                                                                      | S3   |
| • <b>Figure S1</b> The three independent molecules (A, B and C) present in the unit cell of <b>Ni3</b> ·xH <sub>2</sub> O (x = 2,3) including three molecules of dichloromethane. Thermal ellipsoids are shown at the 30% probability level, while OH···Br hydrogen bonding interactions between the coordinated water molecules and free bromide ions are shown with dotted lines. | S4   |
| • <b>Figure S2</b> GPC curves of the polyethylene produced using <b>Ni4</b> /MMAO at different molar ratios (runs 1 – 5, Table 4).                                                                                                                                                                                                                                                  | S5   |
| • <b>Figure S3</b> GPC curves of the polyethylene produced using <b>Ni4</b> /MMAO at different run temperatures (runs 3, 6 – 8, Table 4).                                                                                                                                                                                                                                           | S5   |
| • <b>Figure S4</b> GPC curves of the polyethylene produced using <b>Ni4</b> /MMAO over different run times (runs 3, 9 – 13, Table 4).                                                                                                                                                                                                                                               | S6   |
| • <b>Figure S5</b> GPC curves of the polyethylene produced using <b>Ni1–Ni5</b> /MMAO under optimum conditions (runs 3, 16 – 19, Table 4).                                                                                                                                                                                                                                          | S6   |
| • <b>Figure S6</b> DSC thermogram of the polyethylene produced using <b>Ni4</b> /MMAO (run 4, Table 4).                                                                                                                                                                                                                                                                             | S7   |
| • <b>Figure S7</b> <sup>1</sup> H NMR spectrum of the polyethylene sample produced using <b>Ni4</b> /MMAO at 30 °C (run 3, Table 4); recorded at 100 °C in <i>d</i> -C <sub>2</sub> D <sub>2</sub> Cl <sub>4</sub> .                                                                                                                                                                | S7   |
| • <b>Figure S8</b> <sup>13</sup> C NMR spectrum of the polyethylene sample produced using <b>Ni4</b> /MMAO at 30 °C including an inset of the δ 110–150 ppm region and a segment of the assigned polymer backbone (run 3, Table 4); recorded at 100 °C in <i>d</i> -C <sub>2</sub> D <sub>2</sub> Cl <sub>4</sub> .                                                                 | S8   |
| • <b>Figure S9a</b> <sup>1</sup> H NMR spectrum of ligand <b>L1</b> ; recorded in CDCl <sub>3</sub> at ambient temperature.                                                                                                                                                                                                                                                         | S9   |
| • <b>Figure S9b</b> <sup>13</sup> C NMR spectrum of ligand <b>L1</b> ; recorded in CDCl <sub>3</sub> at ambient temperature.                                                                                                                                                                                                                                                        | S9   |
| • <b>Figure S10a</b> FTIR spectrum of ligand <b>L1</b> .                                                                                                                                                                                                                                                                                                                            | S10  |
| • <b>Figure S10b</b> FTIR spectrum of complex <b>Ni1</b> .                                                                                                                                                                                                                                                                                                                          | S10  |
| • <b>Figure S11a</b> <sup>1</sup> H NMR spectrum of ligand <b>L2</b> ; recorded in CDCl <sub>3</sub> at ambient temperature.                                                                                                                                                                                                                                                        | S11  |
| • <b>Figure S11b</b> <sup>13</sup> C NMR spectrum of ligand <b>L2</b> ; recorded in CDCl <sub>3</sub> at ambient temperature.                                                                                                                                                                                                                                                       | S11  |
| • <b>Figure S12a</b> FTIR spectrum of ligand <b>L2</b> .                                                                                                                                                                                                                                                                                                                            | S12  |
| • <b>Figure S12b</b> FTIR spectrum of complex <b>Ni2</b> .                                                                                                                                                                                                                                                                                                                          | S12  |

|                                                                                                                                                |     |
|------------------------------------------------------------------------------------------------------------------------------------------------|-----|
| • <b>Figure S13</b> $^1\text{H}$ NMR spectrum of aniline <b>A3</b> ; recorded in $\text{CDCl}_3$ at ambient temperature.                       | S13 |
| • <b>Figure S14a</b> $^1\text{H}$ NMR spectrum of ligand <b>L3</b> ; recorded in $\text{CDCl}_3$ at ambient temperature.                       | S13 |
| • <b>Figure S14b</b> $^{13}\text{C}$ NMR spectrum of ligand <b>L3</b> ; recorded in $\text{CDCl}_3$ at ambient temperature.                    | S14 |
| • <b>Figure S15a</b> FTIR spectrum of ligand <b>L3</b> .                                                                                       | S14 |
| • <b>Figure S15b</b> FTIR spectrum of complex <b>Ni3</b> .                                                                                     | S15 |
| • <b>Figure S16</b> $^1\text{H}$ NMR spectrum of aniline <b>A4</b> ; recorded in $\text{CDCl}_3$ at ambient temperature.                       | S16 |
| • <b>Figure S17a</b> $^1\text{H}$ NMR spectrum of ligand <b>L4</b> ; recorded in $\text{CDCl}_3$ at ambient temperature.                       | S16 |
| • <b>Figure S17b</b> $^{13}\text{C}$ NMR spectrum of ligand <b>L4</b> ; recorded in $\text{CDCl}_3$ at ambient temperature.                    | S17 |
| • <b>Figure S18a</b> FTIR spectrum of ligand <b>L4</b>                                                                                         | S17 |
| • <b>Figure S18b</b> FTIR spectrum of complex <b>Ni4</b> .                                                                                     | S18 |
| • <b>Figure S19a</b> $^1\text{H}$ NMR spectrum of aniline <b>A5</b> ; recorded in $\text{CDCl}_3$ at ambient temperature.                      | S19 |
| • <b>Figure S19b</b> $^{13}\text{C}$ NMR spectrum of aniline <b>A5</b> ; recorded in $\text{CDCl}_3$ at ambient temperature.                   | S19 |
| • <b>Figure S20a</b> $^1\text{H}$ NMR spectrum of ligand <b>L5</b> ; recorded in $\text{CDCl}_3$ at ambient temperature.                       | S20 |
| • <b>Figure S20b</b> $^{13}\text{C}$ NMR spectrum of ligand <b>L5</b> ; recorded in $\text{CDCl}_3$ at ambient temperature.                    | S20 |
| • <b>Figure S21a</b> FTIR spectrum of ligand <b>L5</b> .                                                                                       | S21 |
| • <b>Figure S21b</b> FTIR spectrum of complex <b>Ni5</b> .                                                                                     | S21 |
| • <b>Table S1</b> Crystallographic data for <b>Ni3</b> · $x\text{H}_2\text{O}$ ( $x = 2,3$ ), <b>Ni4</b> and <b>Ni5</b>                        | S22 |
| • <b>Table S2</b> $^{13}\text{C}$ NMR data of the polyethylene sample produced using <b>Ni4</b> / $\text{EtAlCl}_2$ at 30 °C (run 3, Table 3). | S23 |
| • <b>Table S3</b> Branching analysis for the polyethylene sample produced using <b>Ni4</b> / $\text{EtAlCl}_2$ at 30 °C (run 3, Table 3).      | S24 |
| • <b>Table S4</b> $^{13}\text{C}$ NMR data for the polyethylene sample produced using <b>Ni4</b> /MMAO at 30 °C (run 3, Table 4).              | S25 |
| • <b>Table S5</b> Branching analysis for the polyethylene sample produced using <b>Ni4</b> /MMAO at 30 °C (run 3, Table 4).                    | S26 |
| • <b>References</b>                                                                                                                            | S26 |

### Preparative details for the anilines (**A3** – **A5**)

As **A1** and **A2** were commercially available (**A1**: CAS number #163704-72-1 and **A2**: CAS number # PH008328), they were used directly for ligand synthesis. The other anilines, 2,6- $\{\text{CH}(\text{C}_6\text{H}_5)_2\}_2$ -4- $\text{NO}_2\text{C}_6\text{H}_2\text{NH}_2$  (**A3**) 2,6- $\{\text{CH}(4\text{-F-C}_6\text{H}_4)_2\}_2$ -4- $\text{NO}_2\text{C}_6\text{H}_2\text{NH}_2$  (**A4**) and 2,6-*i*-Pr<sub>2</sub>-3- $\text{NO}_2$ -4-(4-FPh)<sub>2</sub>C<sub>6</sub>H<sub>2</sub>NH<sub>2</sub> (**A5**), were prepared using routes described below and illustrated in Schemes S1 and S2 below, respectively.

(i) Preparation of 2,6- $\{\text{CH}(4\text{-R-C}_6\text{H}_4)_2\}_2$ -4- $\text{NO}_2\text{C}_6\text{H}_2\text{NH}_2$  (R = H **A3**, R = F **A4**).

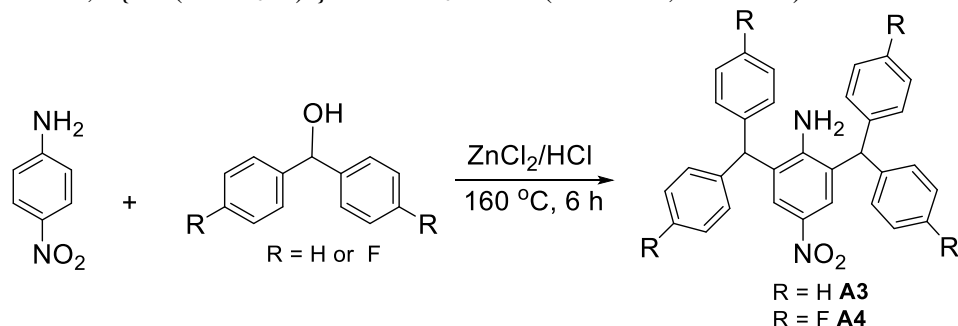

**Scheme S1** Synthetic route to anilines **A3** and **A4**.

Based on procedures described in the literature [S1-S4], a mixture of 4-nitroaniline (4.0 g, 29 mmol) and diphenylmethanol (10.7 g, 59.9 mmol) was stirred and heated at 160 °C for 20 min to form a homogeneous melt. Then a solution of  $\text{ZnCl}_2$  (15%) in conc.  $\text{HCl}$  (5 mL) was added dropwise to the melt at a stirring speed of 800 rpm. The reaction mixture was further stirred and heated at 160 °C for a further 7 h. Upon cooling to room temperature, the resulting solid was dissolved in dichloromethane (500 mL).

The solution was washed firstly with aqueous solution of  $\text{NH}_4\text{Cl}$  ( $3 \times 200$  mL) and then secondly with an aqueous solution of  $\text{NaCl}$  ( $2 \times 250$  mL). The organic phase was dried over anhydrous  $\text{MgSO}_4$  and filtered. After evaporation of the majority of the solvent under reduced pressure, the viscous syrup was dissolved in a minimum amount of dichloromethane and recrystallized from excess methanol to afford the desired product **A3** as a yellow crystalline powder (7.6 g, 56%).

Compound **A3**:  $^1\text{H}$  NMR (400 Hz,  $\text{CDCl}_3$ , TMS):  $\delta$  7.03-6.93 (m, 13H, Ph-H), 6.79-6.78 (m, 8H, Ph-H), 5.05 (s, 2H, -CH-), 3.88 (s, 2H,  $\text{NH}_2$ ).

Similarly, a mixture of 4-nitroaniline (4.0 g, 29 mmol) and bis-(4-fluorophenyl)methanol (12.75 g, 59 mmol) was stirred and heated at  $160^\circ\text{C}$  for 20 min to form a homogeneous melt. Then a solution of  $\text{ZnCl}_2$  (15%) in conc.  $\text{HCl}$  (5 mL) was added dropwise to the melt at a stirring speed of 800 rpm. The reaction mixture was further stirred and heated at  $160^\circ\text{C}$  for a further 7 h. Upon cooling to room temperature, the resulting solid was dissolved in dichloromethane (500 mL). The solution was washed with an aqueous solution of  $\text{NH}_4\text{Cl}$  ( $3 \times 200$  mL) and then an aqueous solution of  $\text{NaCl}$  ( $2 \times 250$  mL). The organic phase was dried over anhydrous  $\text{MgSO}_4$  and filtered. After evaporation of the majority of the solvent under reduced pressure, the viscous syrup was dissolved in a minimum amount of dichloromethane and recrystallized from excess methanol to afford the desired product **A4** as a yellow powder (6.8 g, 43%).

Compound **A4**:  $^1\text{H}$  NMR (400 Hz,  $\text{CDCl}_3$ , TMS):  $\delta$  7.52 (s, 2H), 7.04–7.03 (m, 16H,  $\text{CH}(\text{F-Ph})_2$ ), 5.33 (s, 2H, -CH-), 4.15 (s, 2H,  $\text{NH}_2$ ).

Additionally, the complete characterization data of **A3** and **A4** could be found in references S3 and S4.

(ii) Preparation of 2,6-diisopropyl-3-nitro-4-(4,4-difluorobenzhydryl)aniline (**A5**)

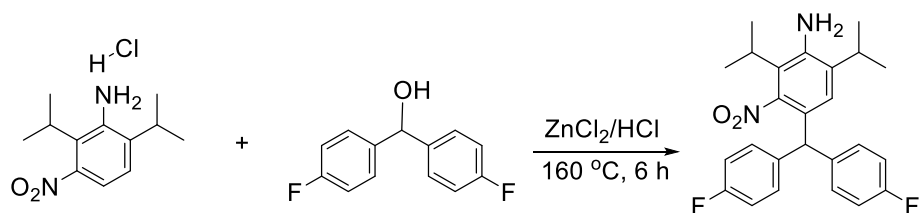

**Scheme S2** Synthetic route to 2,6-diisopropyl-3-nitro-4-(4,4-difluorobenzhydryl)aniline (**A5**)

A mixture of 2,6-diisopropyl-3-nitroaniline hydrochloride (11.7 g, 45.2 mmol) and bis(4-fluorophenyl)methanol (10.15 g, 46.1 mmol) was stirred at  $155^\circ\text{C}$  for 20 min to form a homogeneous melt. Then a solution of  $\text{ZnCl}_2$  (2.35 g, 20%) in conc.  $\text{HCl}$  (5 mL) was added dropwise at a stirring speed of 800 rpm. The reaction mixture was further stirred and heated at  $160^\circ\text{C}$  for further 6 h and then allowed to cool to room temperature. The resulting solid was dissolved in dichloromethane (400 mL) by using an ultra-sonic water bath and washed with aqueous solution of  $\text{NH}_4\text{Cl}$  ( $3 \times 200$  mL) and then an aqueous solution of  $\text{NaCl}$  ( $2 \times 200$  mL). The organic phase was dried with anhydrous  $\text{MgSO}_4$ , filtered and then evaporated under reduced pressure to give a brown viscous residue. This residue was recrystallized by dissolving in a minimum amount of dichloromethane, followed by the addition of excess methanol to afford the desired product as a yellow powder (16.26 g, 85%).

**A5:**  $^1\text{H}$  NMR (400 Hz,  $\text{CDCl}_3$ , TMS):  $\delta$  7.01–6.93 (m, 8H,  $\text{CH}(\text{F}-\text{Ph})_2$ ), 6.64 (s, 1H), 5.32 (s, 1H,  $-\text{CH}-$ ), 3.95 (s, 2H,  $\text{NH}_2$ ), 2.98–2.90 (m, 1H,  $-\text{CH}-$ ), 2.86–2.79 (m, 1H,  $-\text{CH}-$ ), 1.38–1.36 (d,  $J = 8.0$ , 6H,  $-\text{CH}_3$ ), 1.12–1.10 (d,  $J = 8.0$ , 6H,  $-\text{CH}_3$ ).

$^{13}\text{C}$  NMR (100 MHz,  $\text{CDCl}_3$ , TMS):  $\delta$  162.8, 160.4, 150.4, 141.3, 138.4, 138.3, 134.4, 130.6, 130.5, 125.2, 122.9, 121.2, 115.3, 115.1, 49.5, 49.5, 28.6, 27.8, 22.0, 19.8.

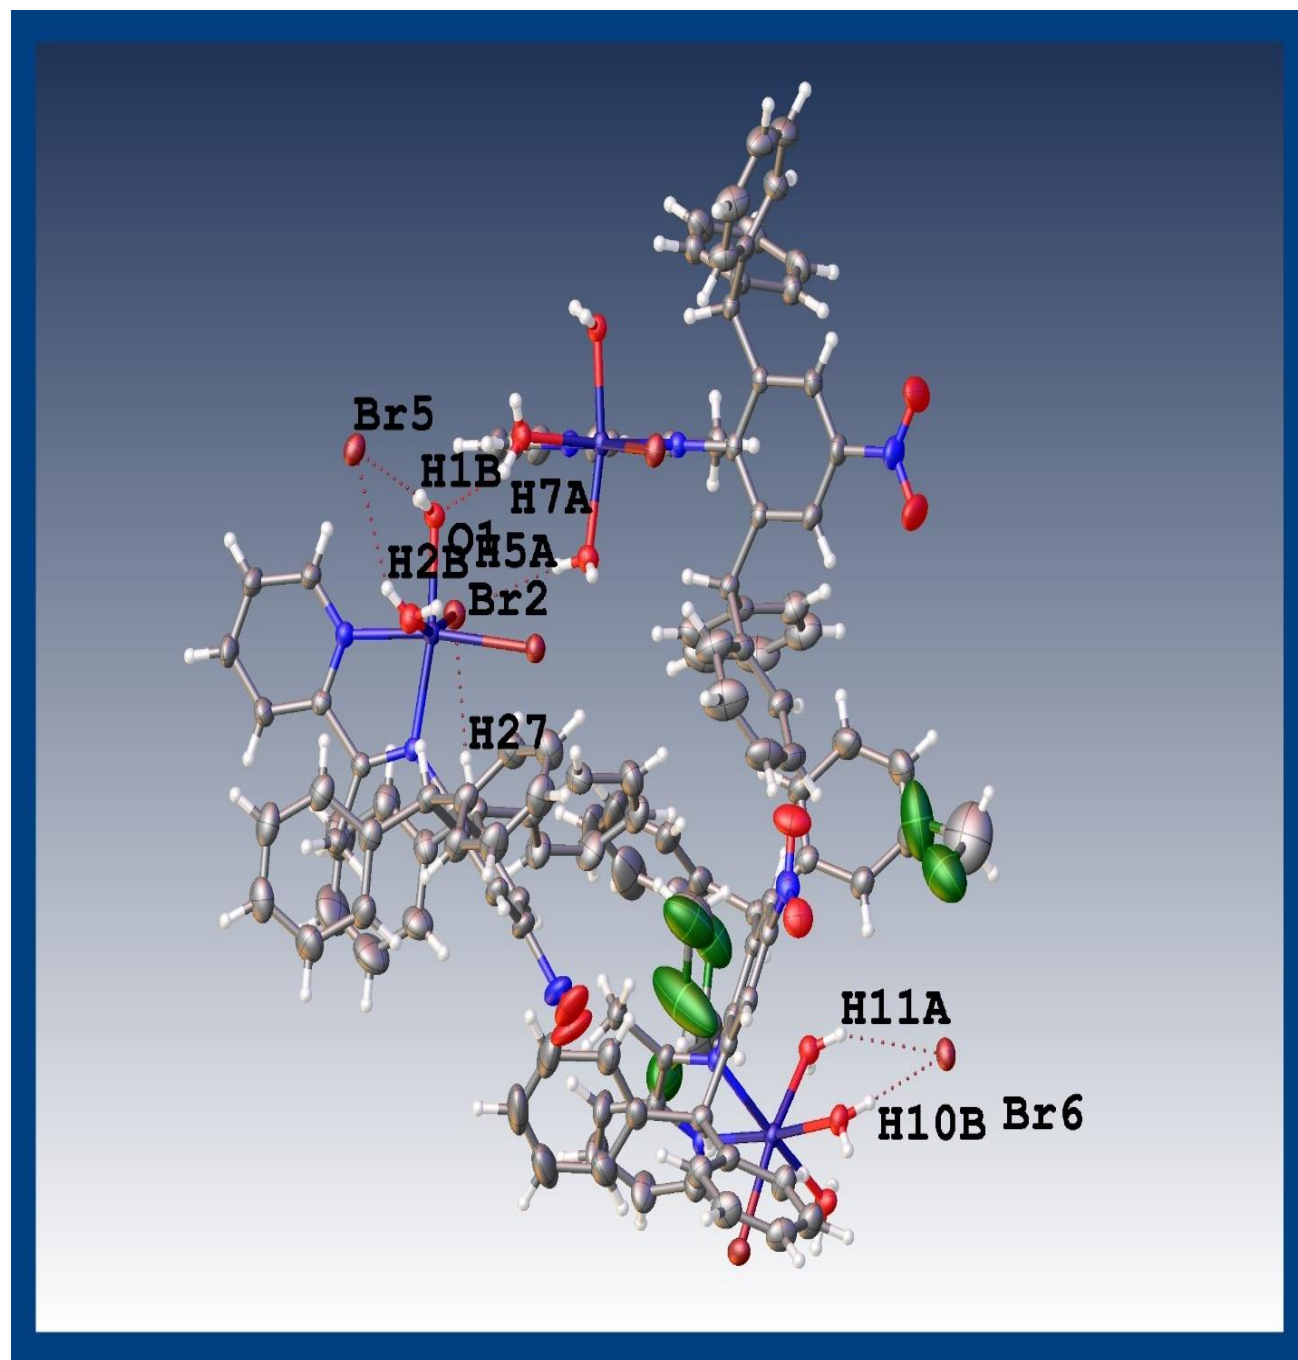

**Figure S1** The three independent molecules (A, B and C) present in the unit cell of  $\text{Ni3} \cdot x\text{H}_2\text{O}$  ( $x = 2,3$ ) including three molecules of dichloromethane. Thermal ellipsoids are shown at the 30% probability level while  $\text{OH} \cdots \text{Br}$  hydrogen bonding interactions between the coordinated water molecules and free bromide ions are shown with dotted lines.

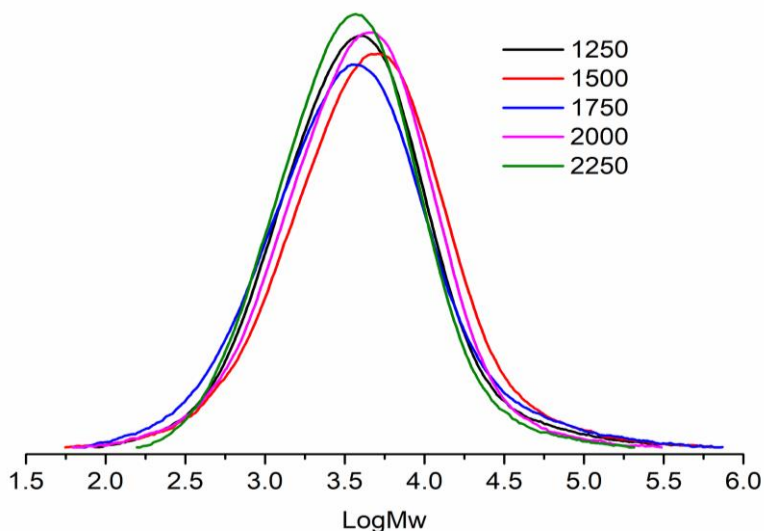

**Figure S2** GPC curves of the polyethylene produced using  $\text{Ni4}/\text{MMAO}$  at different molar ratios (runs 1 – 5, Table 4).

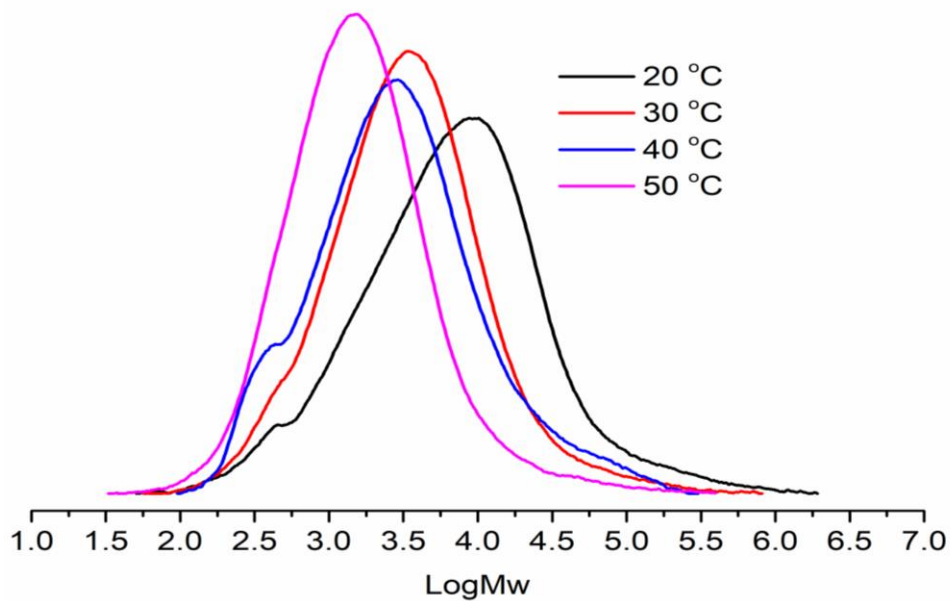

**Figure S3** GPC curves of the polyethylene produced using  $\text{Ni4}/\text{MMAO}$  at different run temperatures (runs 3, 6 – 8, Table 4).

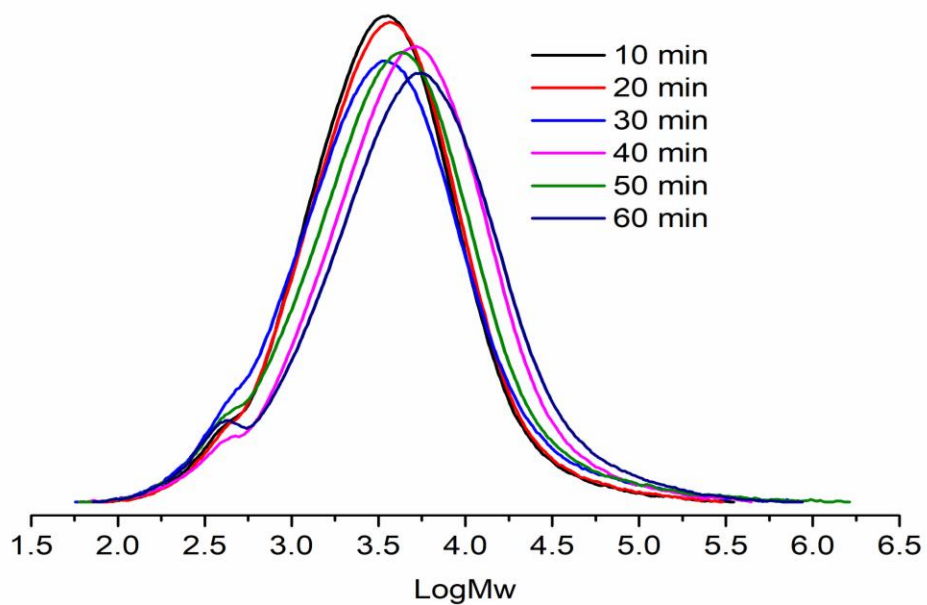

**Figure S4** GPC curves of the polyethylene produced using **Ni4**/MMAO over different run times (runs 3, 9 – 13, Table 4).

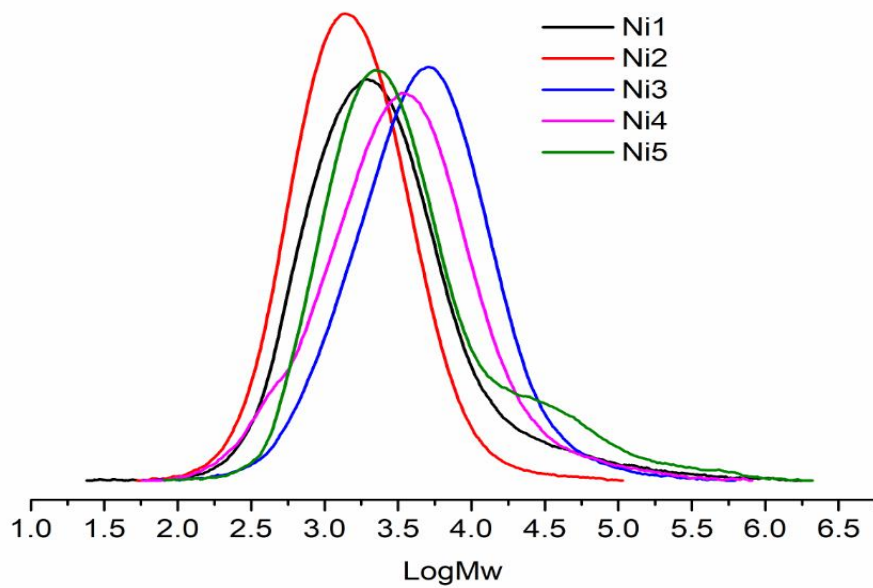

**Figure S5** GPC curves of the polyethylene produced using **Ni1 – Ni5**/MMAO under optimum conditions (runs 3, 16 – 19, Table 4).

Sample: M-T1R6  
Size: 5.3400 mg  
Method: wsl

DSC

File: D:\DSCQ2000\sunwenhua\DESUM-T1R6.001

Run Date: 15-Oct-2021 15:12  
Instrument: DSC Q2000 V24.11 Build 124

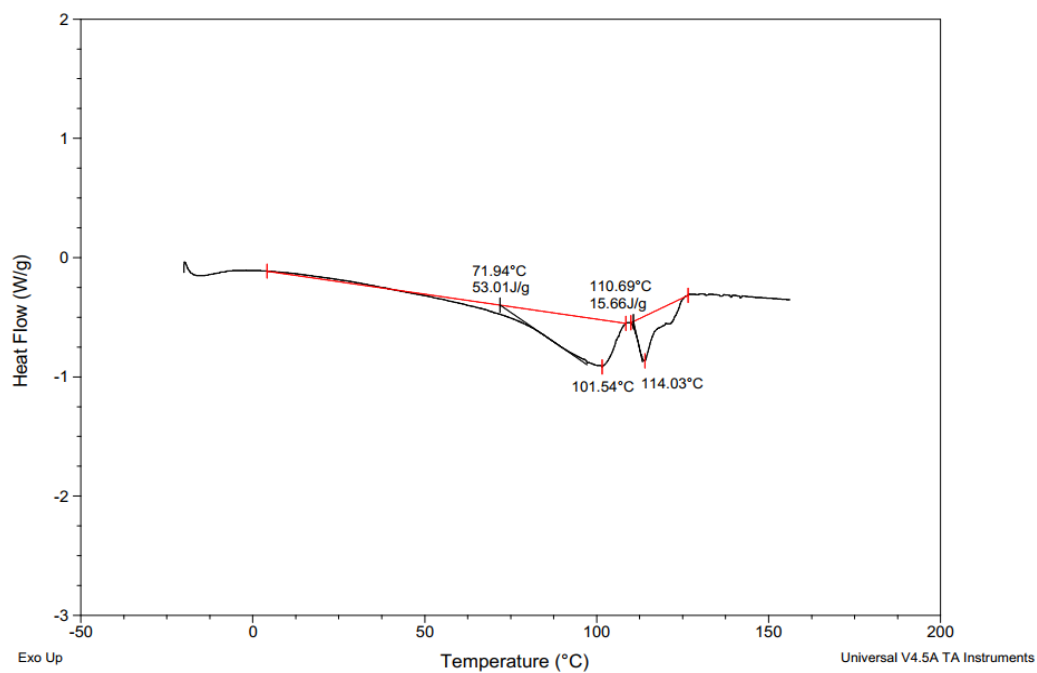

**Figure S6** DSC thermogram of the polyethylene produced using **Ni4**/MMAO (run 4, Table 4).

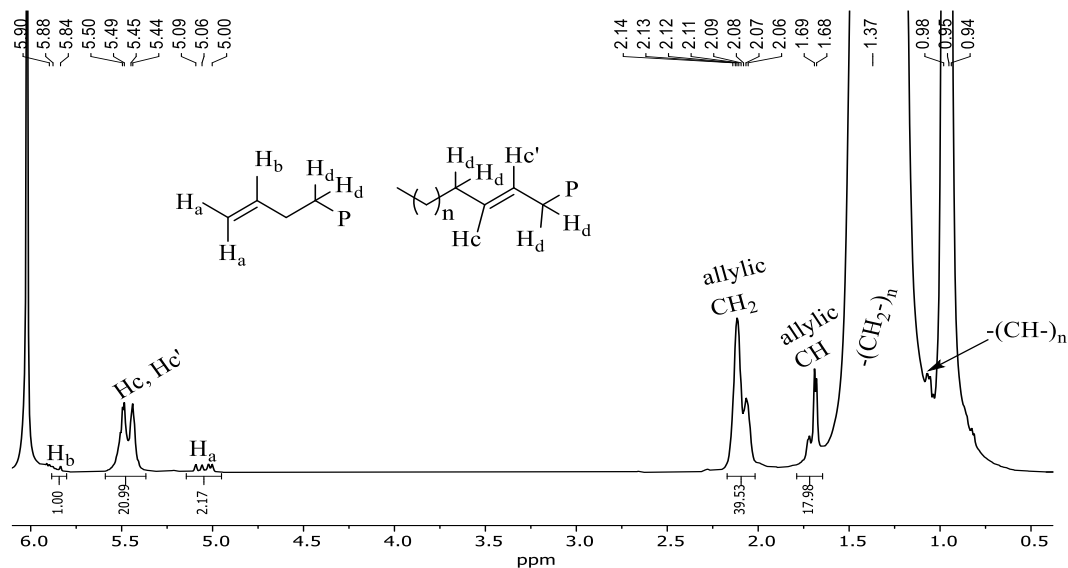

**Figure S7** <sup>1</sup>H NMR spectrum of the polyethylene sample produced using **Ni4**/MMAO at 30 °C (run 3, Table 4); recorded at 100 °C in *d*-C<sub>2</sub>D<sub>2</sub>Cl<sub>4</sub>.

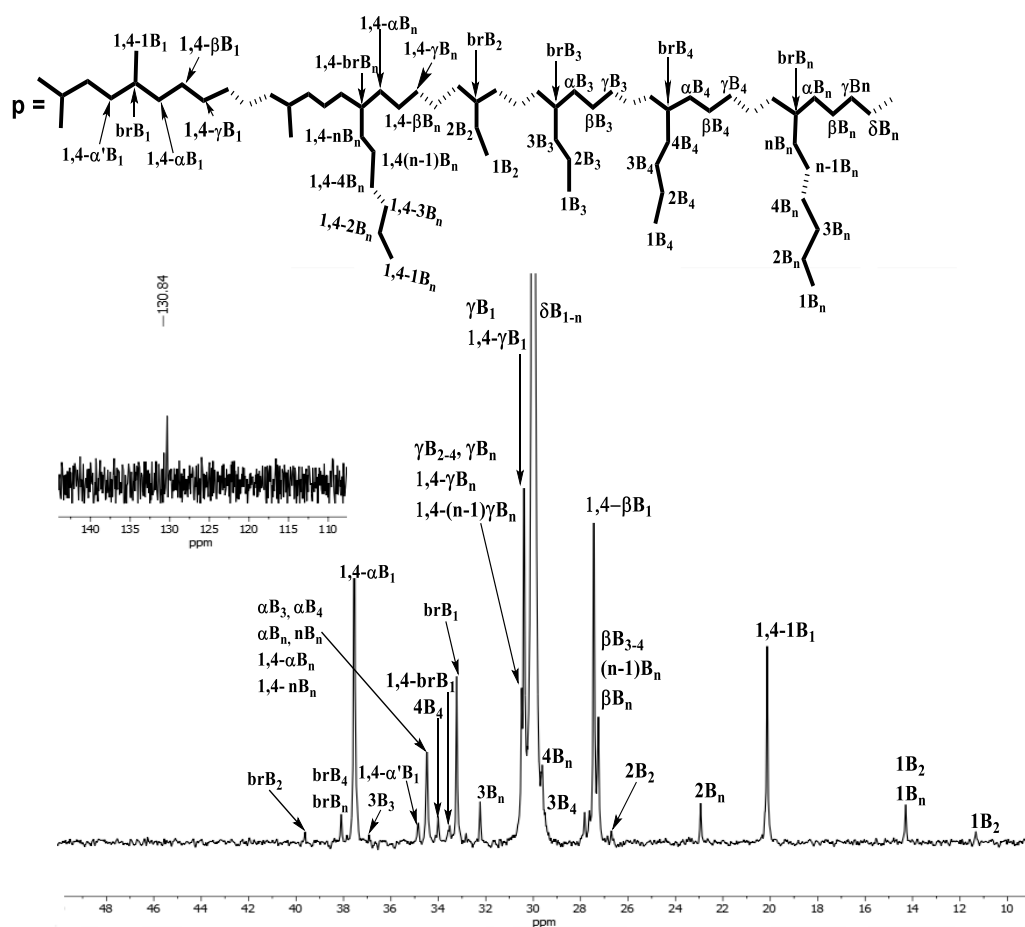

**Figure S8**  $^{13}\text{C}$  NMR spectrum of the polyethylene sample produced using **Ni4**/MMAO at 30 °C, including an inset of the  $\delta$  110–150 ppm region and a segment of the assigned polymer backbone (run 3, Table 4); recorded at 100 °C in  $d\text{-C}_2\text{D}_2\text{Cl}_4$ .

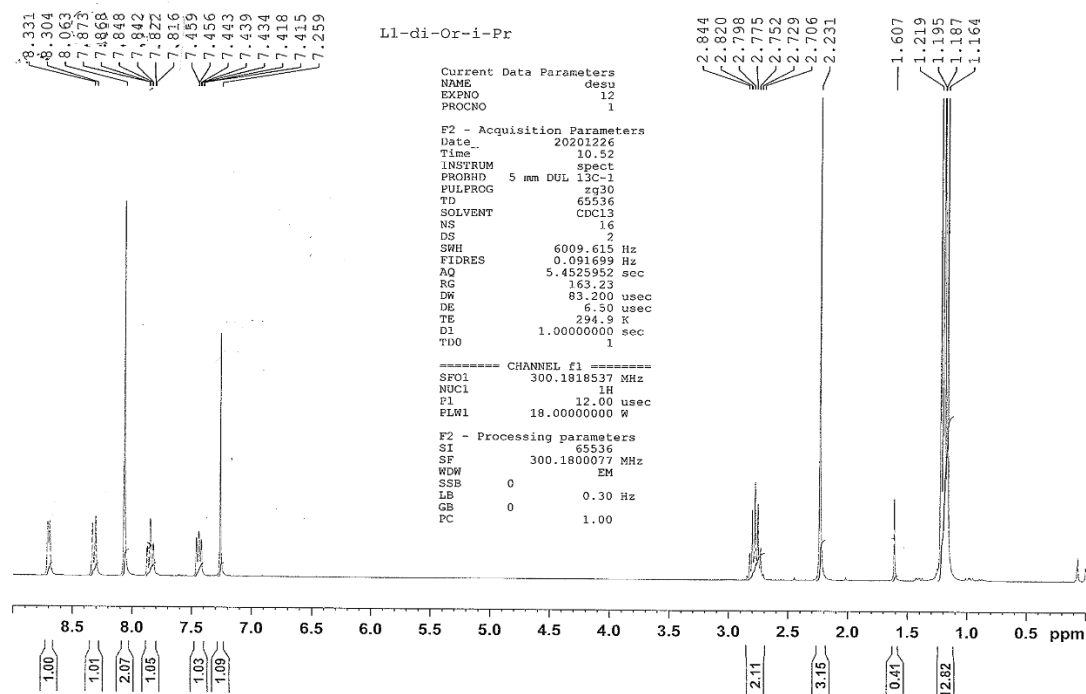

**Figure S9a**  $^1\text{H}$  NMR spectrum of ligand **L1**; recorded in  $\text{CDCl}_3$  at ambient temperature.

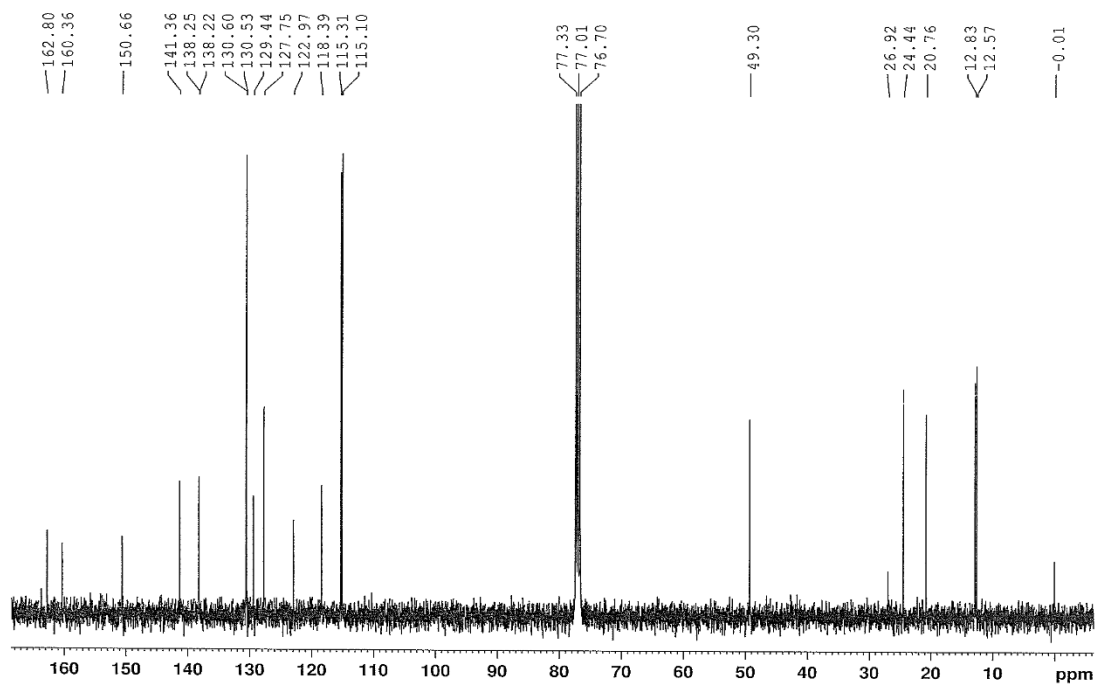

**Figure S9b**  $^{13}\text{C}$  NMR spectrum of ligand **L1**; recorded in  $\text{CDCl}_3$  at ambient temperature.

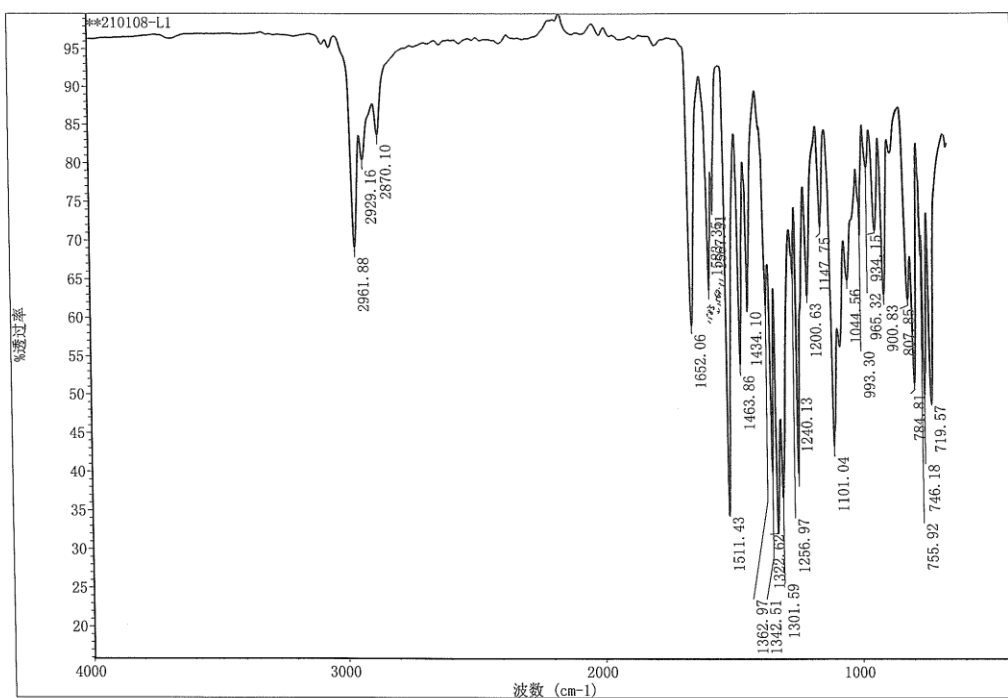

**Figure S10a** FTIR spectrum of ligand L1.

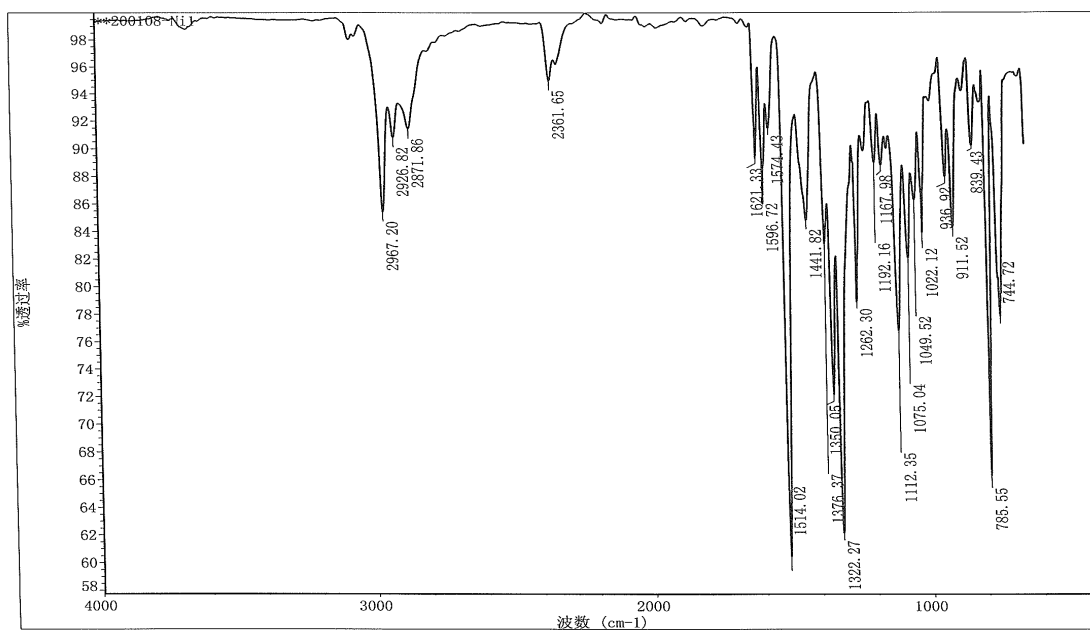

**Figure S10b** FTIR spectrum of complex Ni1.

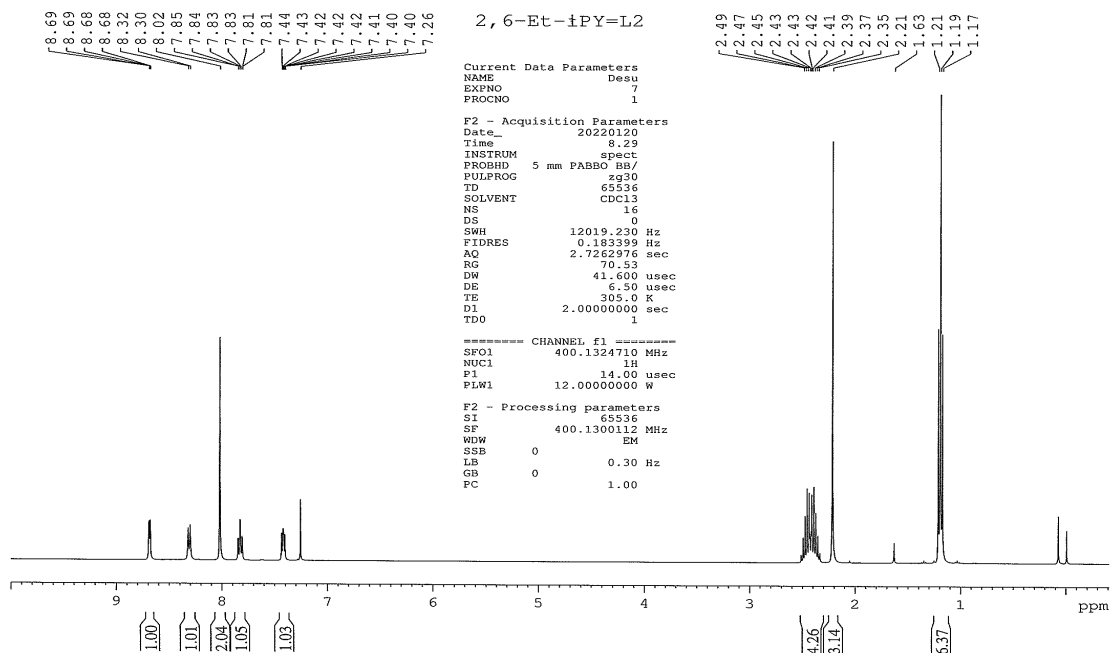

**Figure S11a**  $^1\text{H}$  NMR spectrum of ligand **L2**; recorded in  $\text{CDCl}_3$  at ambient temperature.

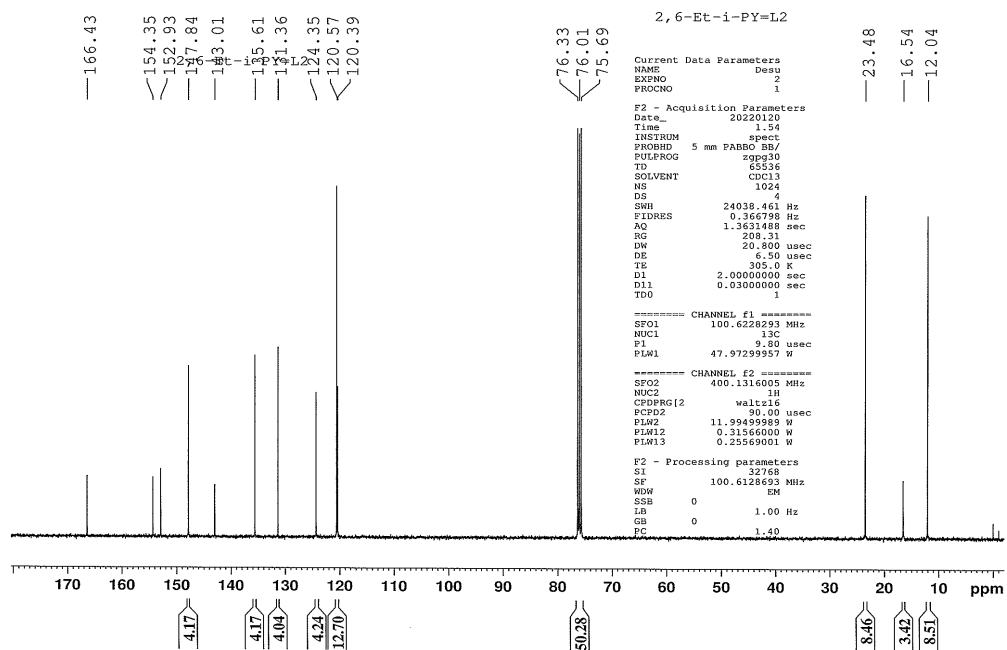

**Figure S11b**  $^{13}\text{C}$  NMR spectrum of ligand **L2**; recorded in  $\text{CDCl}_3$  at ambient temperature.

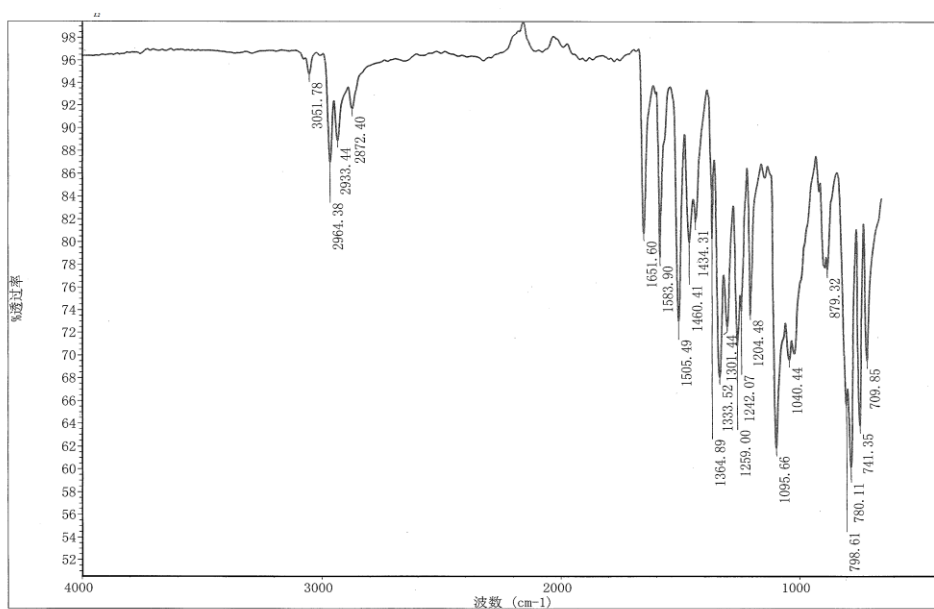

**Figure S12a** FTIR spectrum of ligand **L2**.

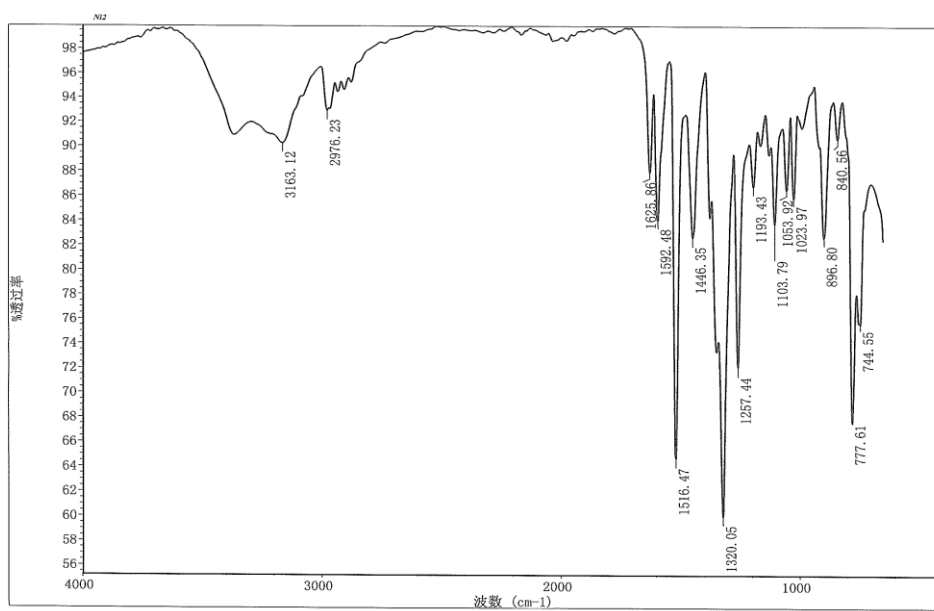

**Figure S12b** FTIR spectrum of complex **Ni2**.

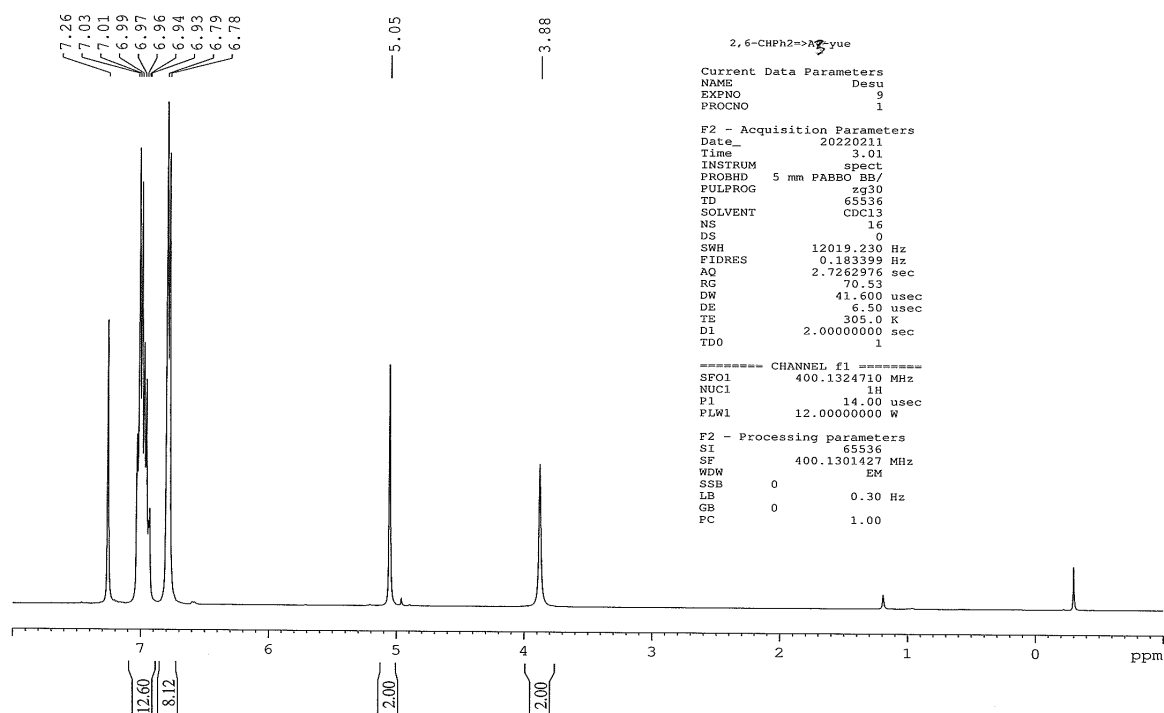

Figure S13  $^1\text{H}$  NMR spectrum of aniline **A3**; recorded in  $\text{CDCl}_3$  at ambient temperature.

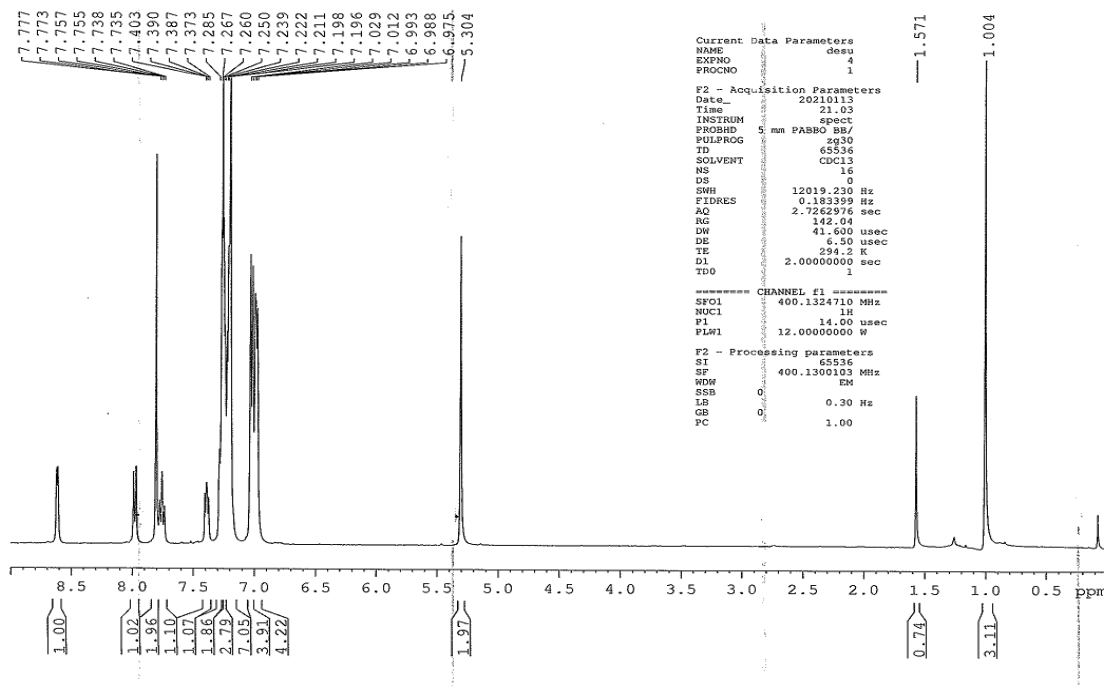

Figure S14a  $^1\text{H}$  NMR spectrum of ligand **L3**; recorded in  $\text{CDCl}_3$  at ambient temperature.

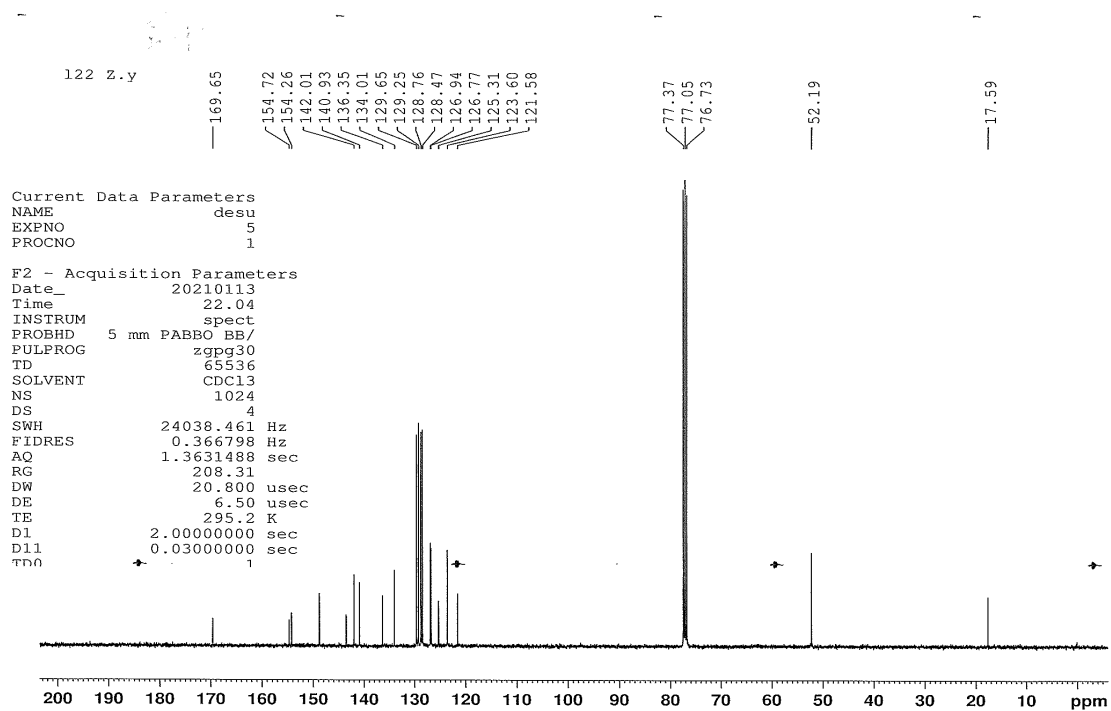

**Figure S14b**  $^{13}\text{C}$  NMR spectrum of ligand **L3**; recorded in  $\text{CDCl}_3$  at ambient temperature.

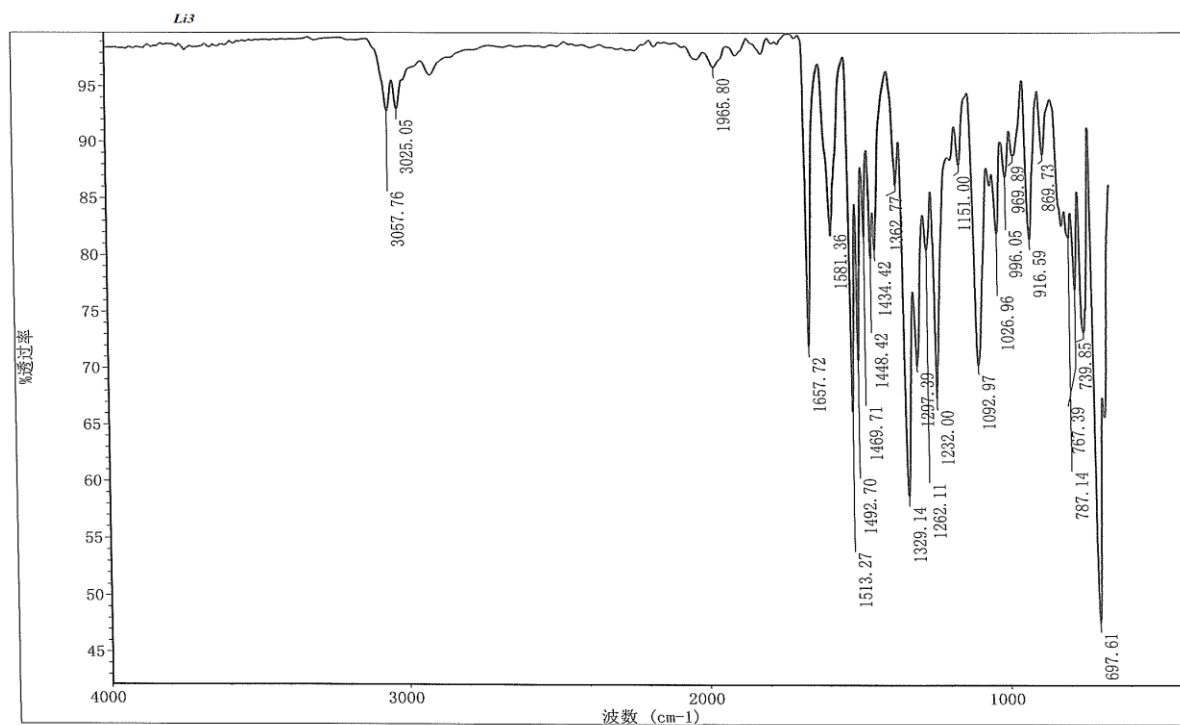

**Figure S15a** FTIR spectrum of ligand **L3**.

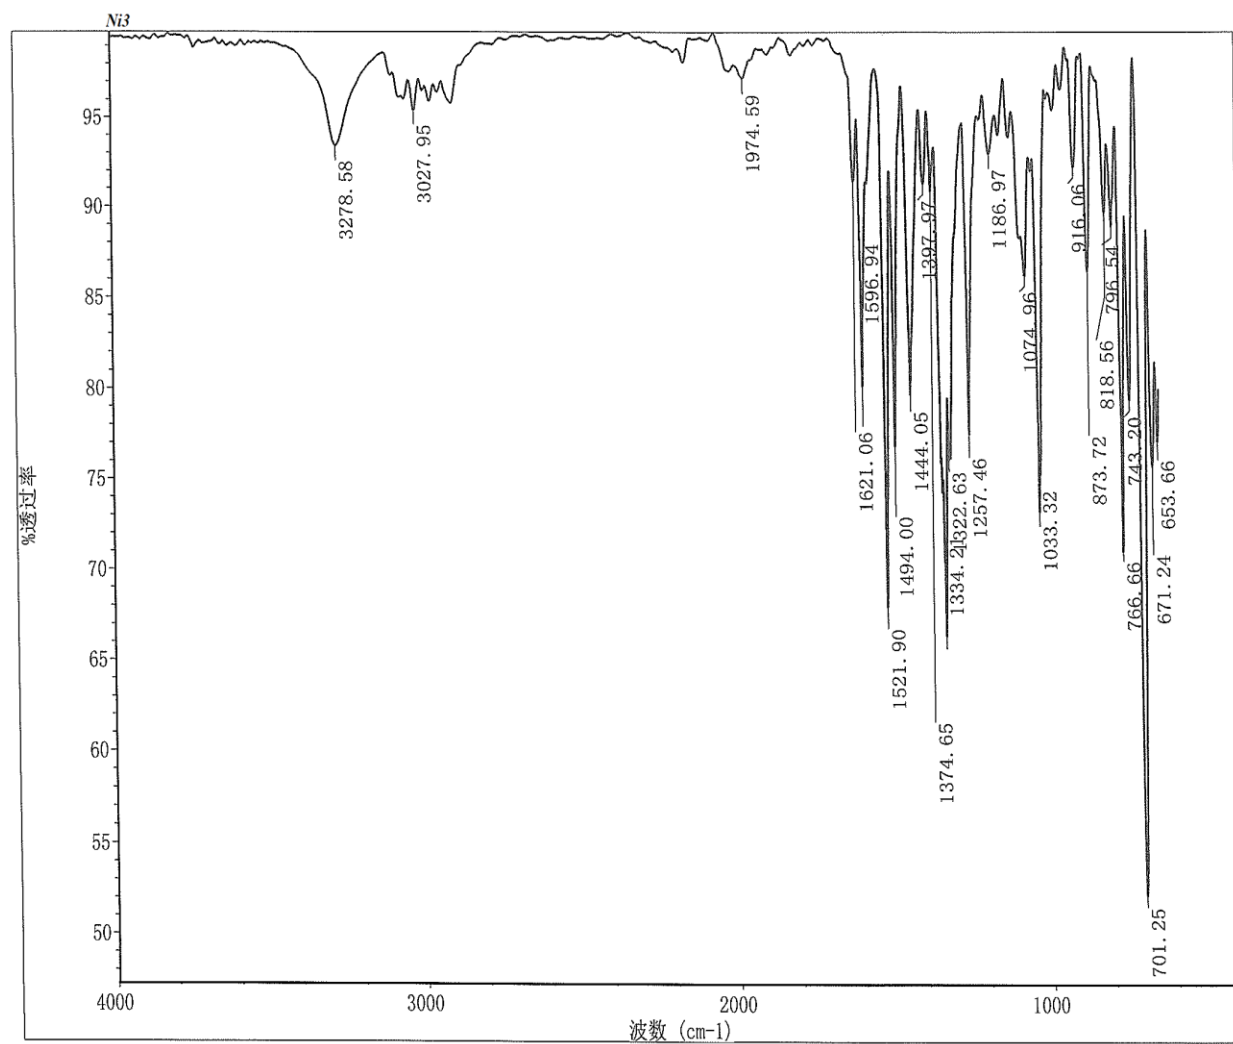

**Figure S15b** FTIR spectrum of complex **Ni3**.

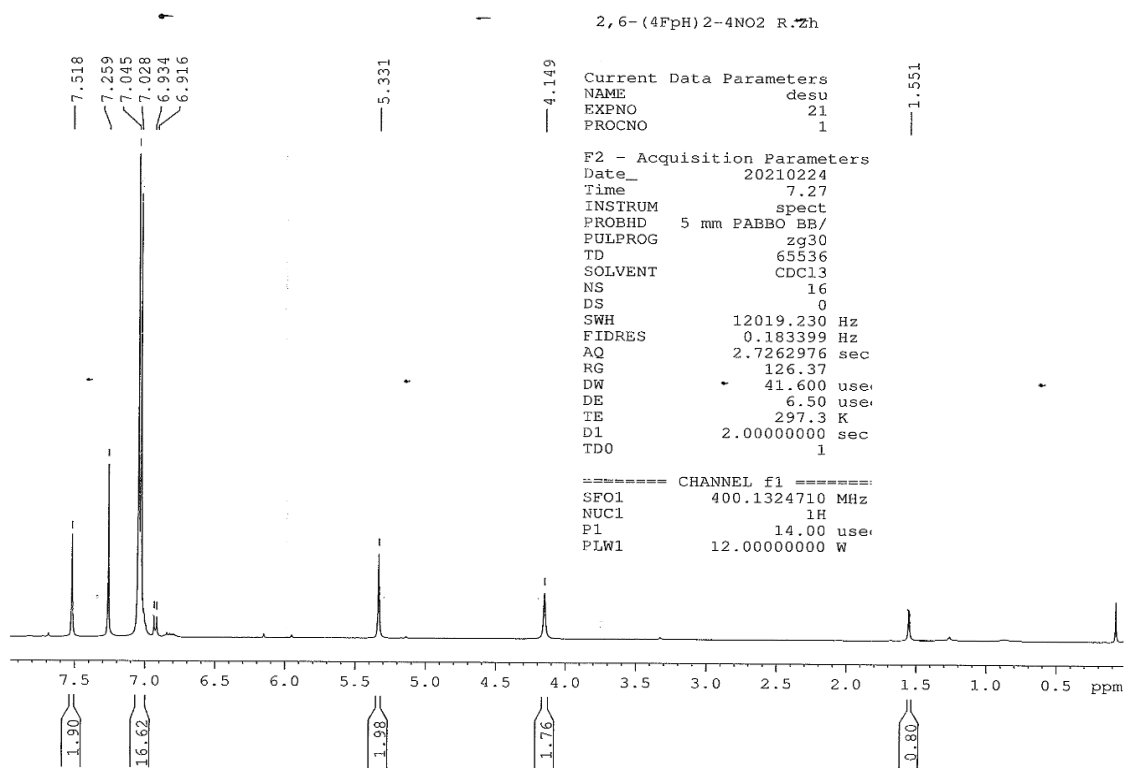

**Figure S16**  $^1\text{H}$  NMR spectrum of aniline **A4**; recorded in  $\text{CDCl}_3$  at ambient temperature.

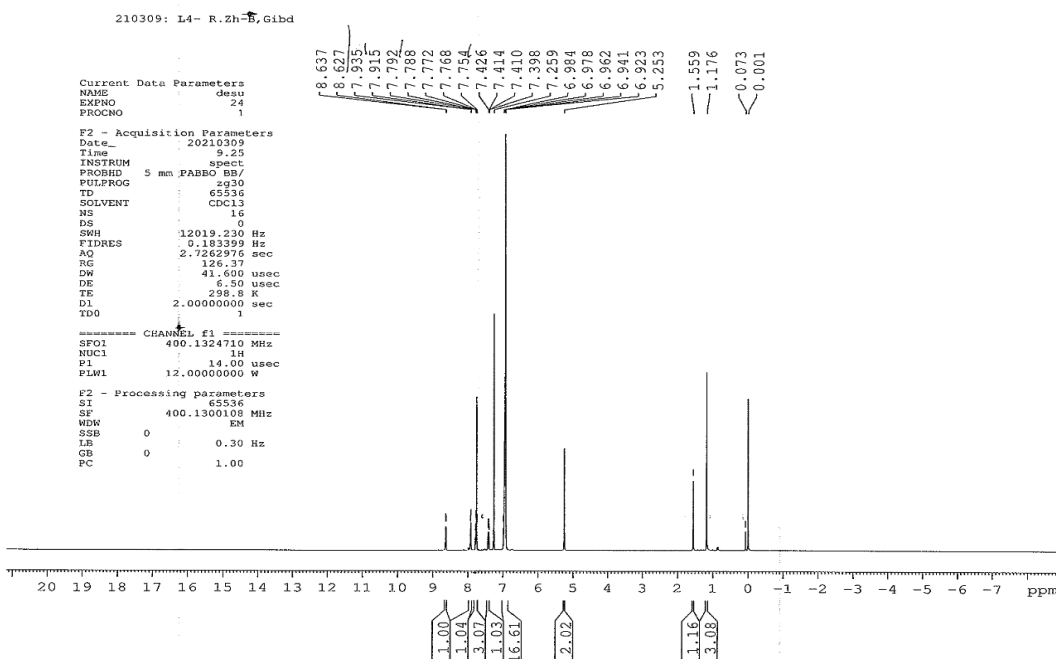

**Figure S17a**  $^1\text{H}$  NMR spectrum of ligand **L4**; recorded in  $\text{CDCl}_3$  at ambient temperature.

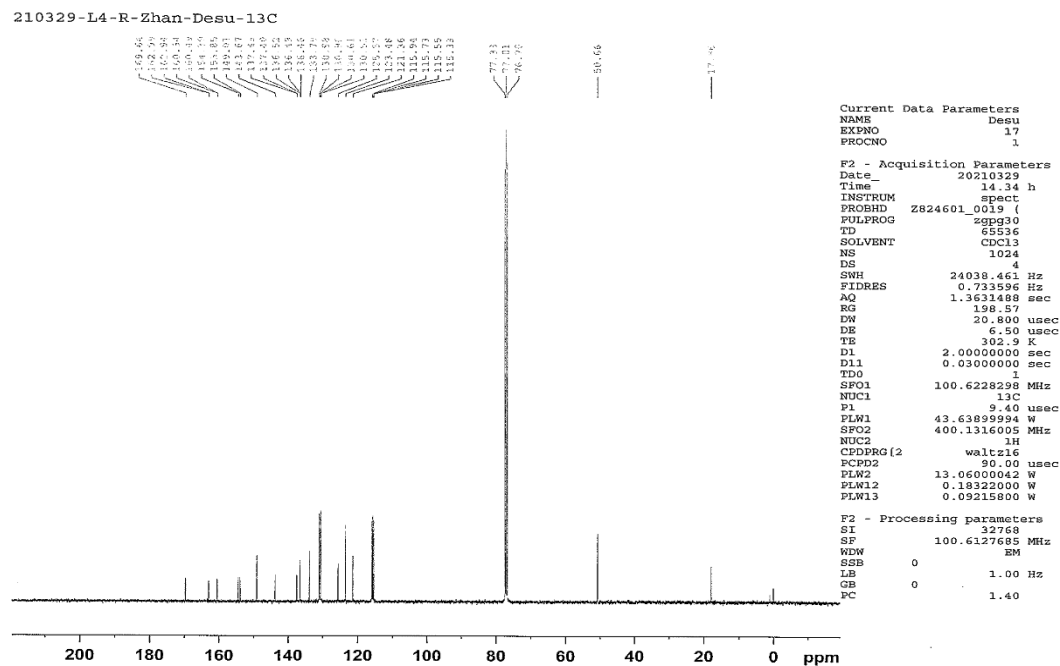

Figure S17b  $^{13}\text{C}$  NMR spectrum of ligand **L4**; recorded in  $\text{CDCl}_3$  at ambient temperature.

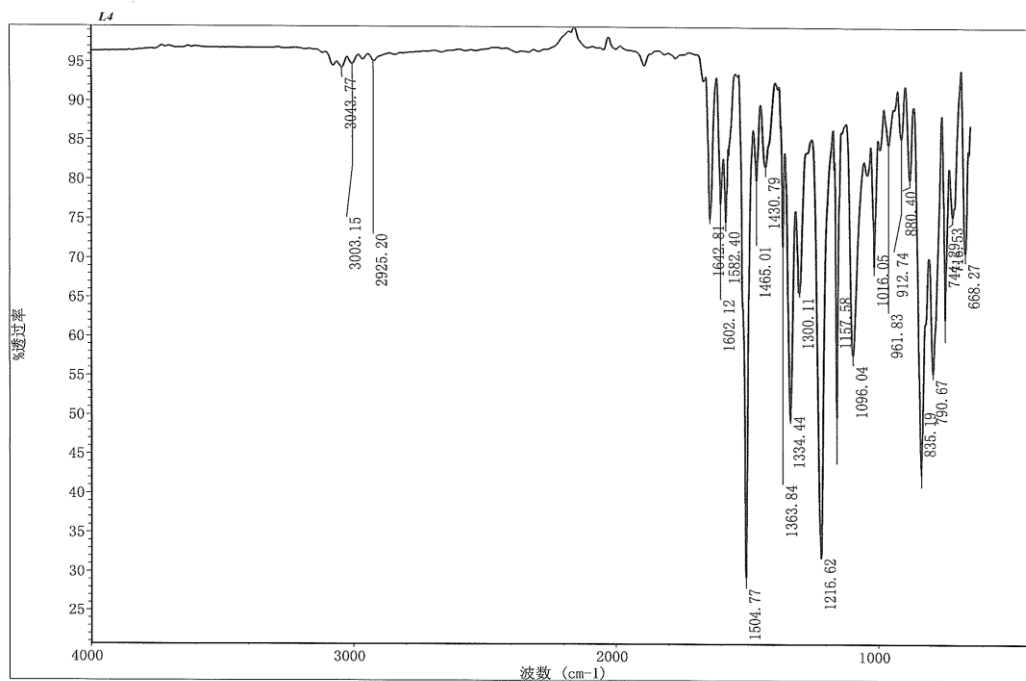

Figure S18a FTIR spectrum of ligand **L4**.

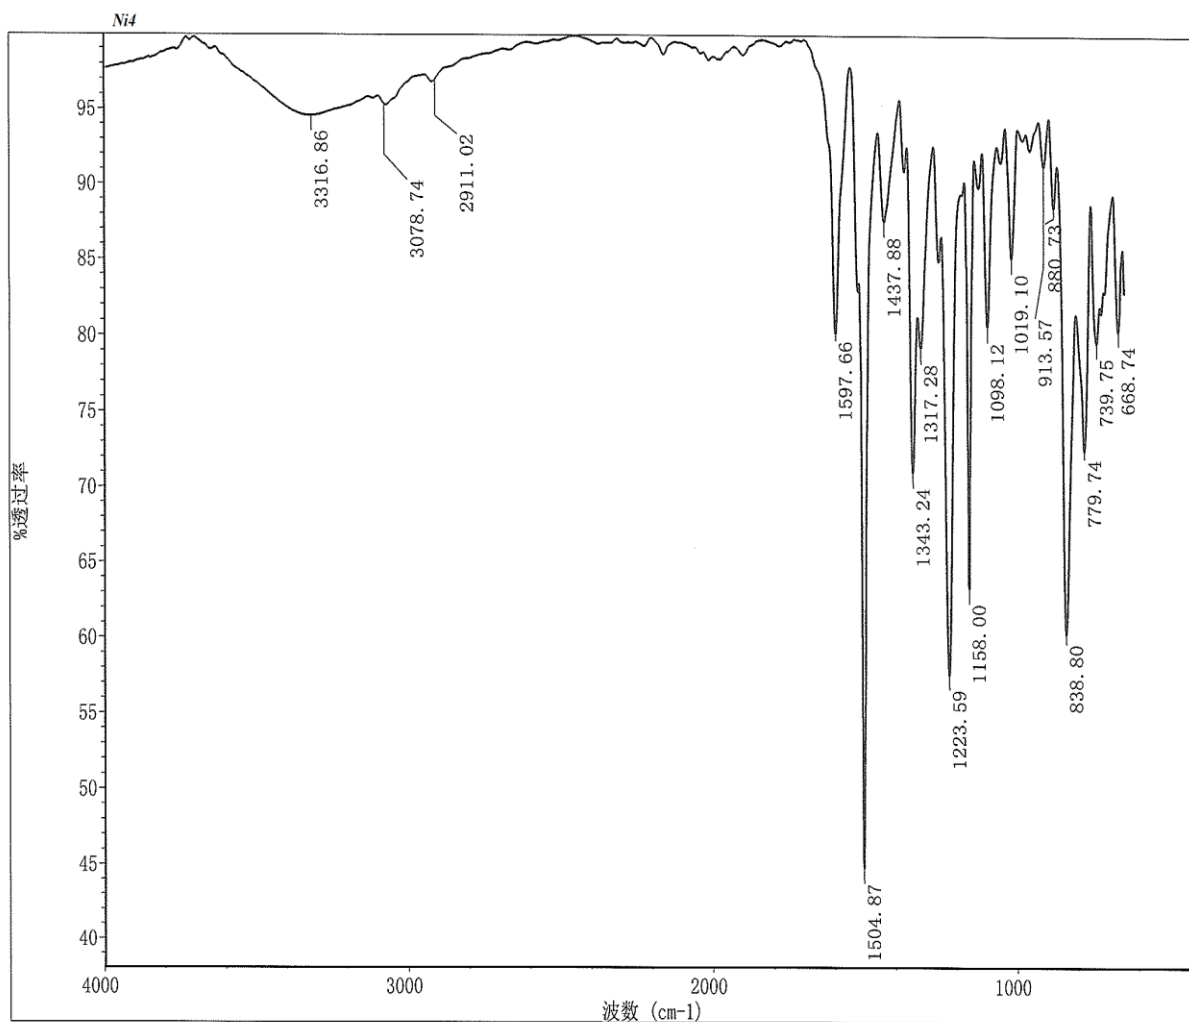

**Figure S18b** FTIR spectrum of complex **Ni4**.

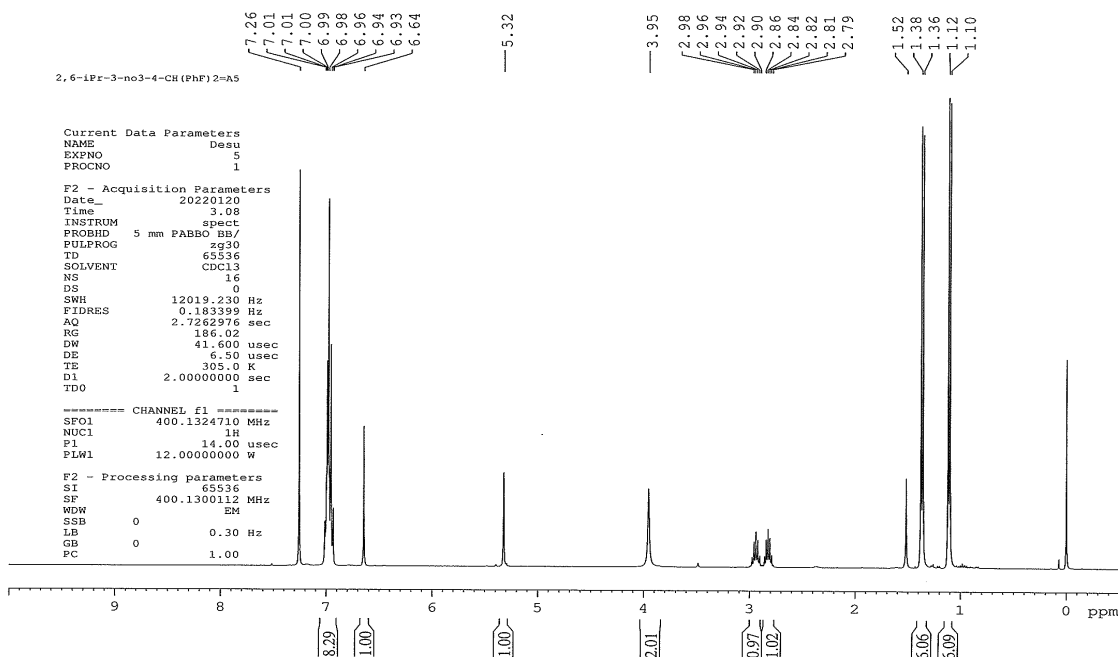

**Figure S19a**  $^1\text{H}$  NMR spectrum of aniline **A5**; recorded in  $\text{CDCl}_3$  at ambient temperature.

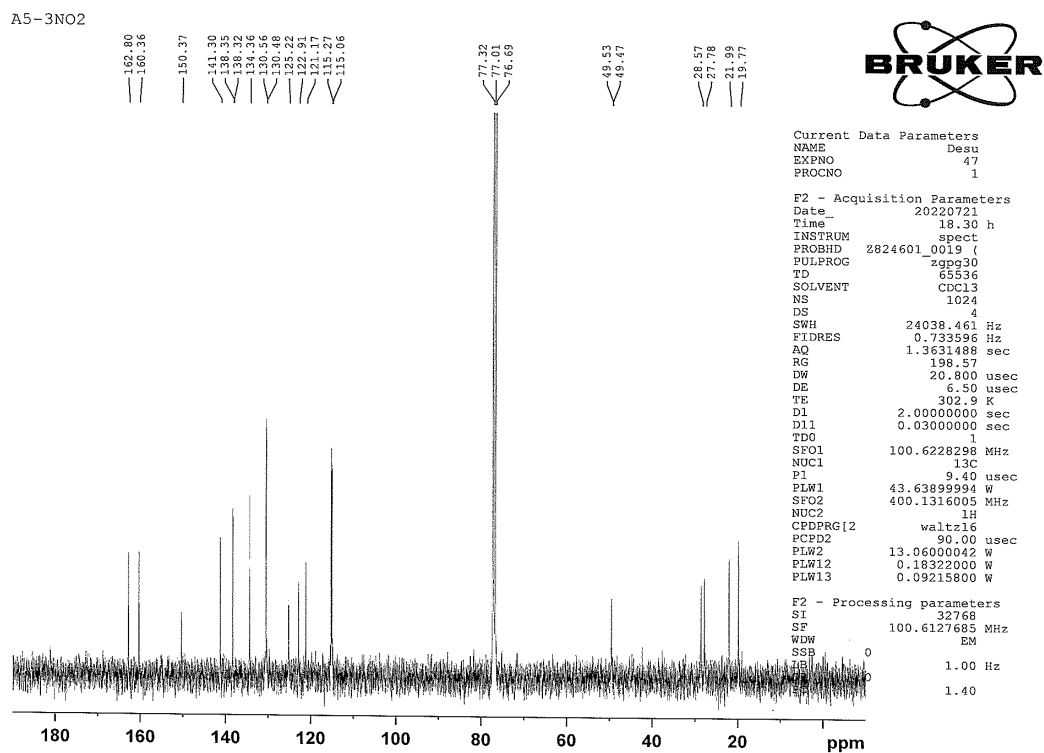

**Figure S19b**  $^{13}\text{C}$  NMR spectrum of aniline **A5**; recorded in  $\text{CDCl}_3$  at ambient temperature.

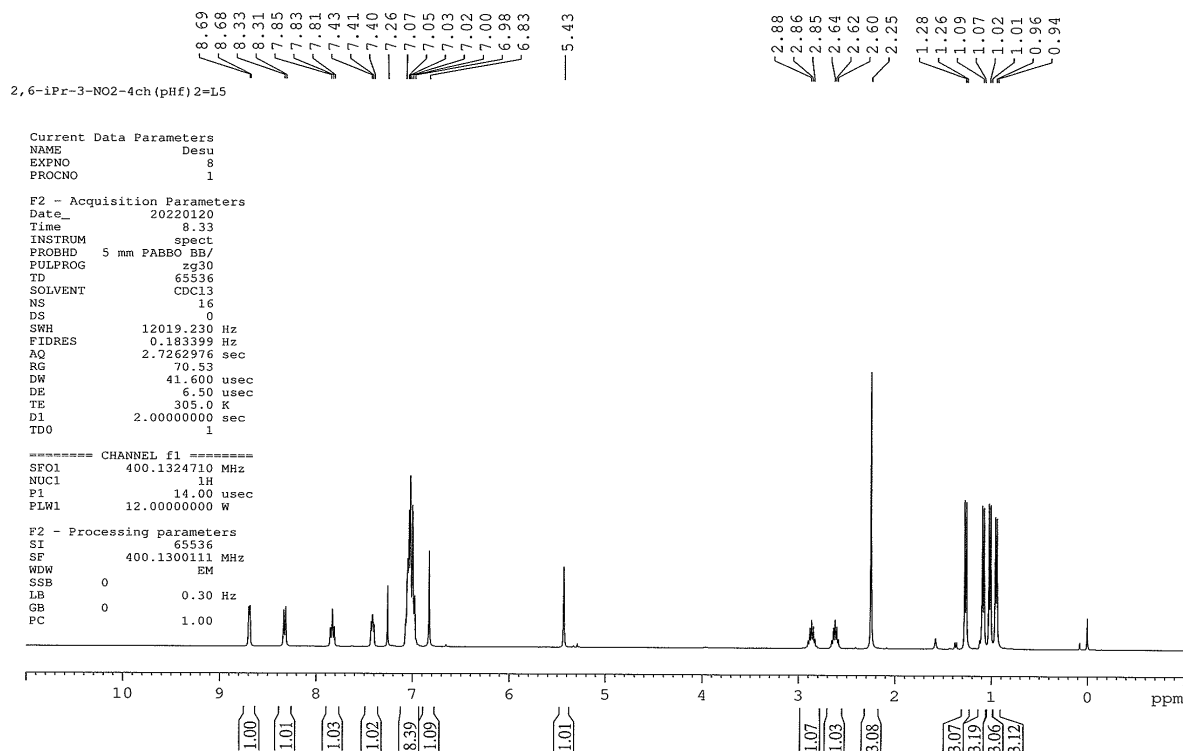

**Figure S20a**  $^1\text{H}$  NMR spectrum of ligand **L5**; recorded in  $\text{CDCl}_3$  at ambient temperature.

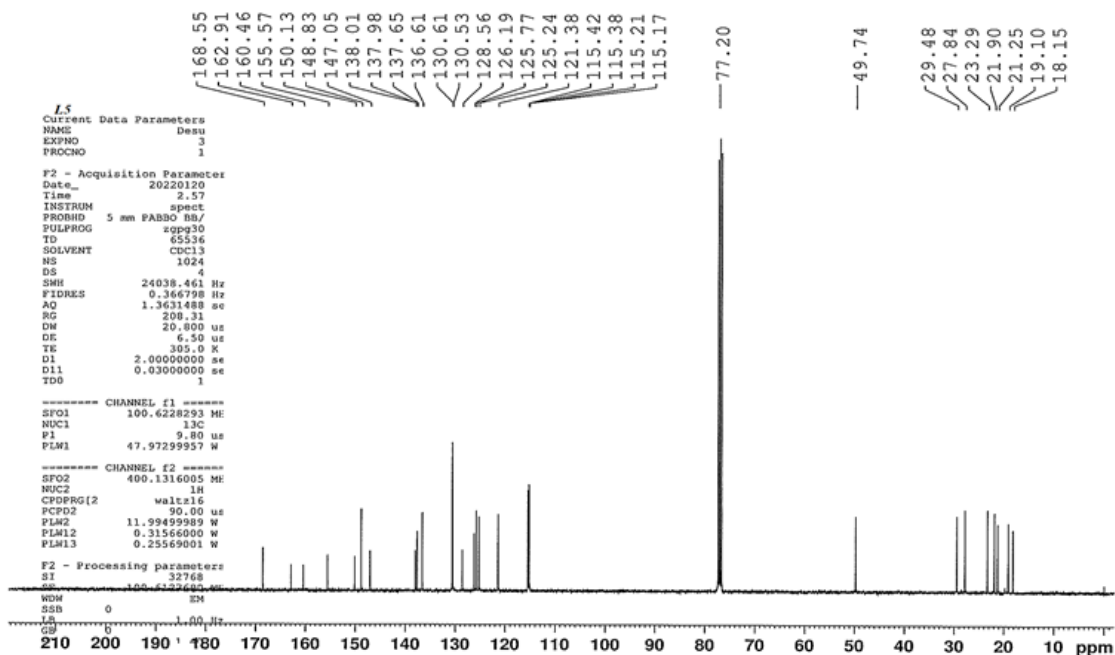

**Figure S20b**  $^{13}\text{C}$  NMR spectrum of ligand **L5**; recorded in  $\text{CDCl}_3$  at ambient temperature.

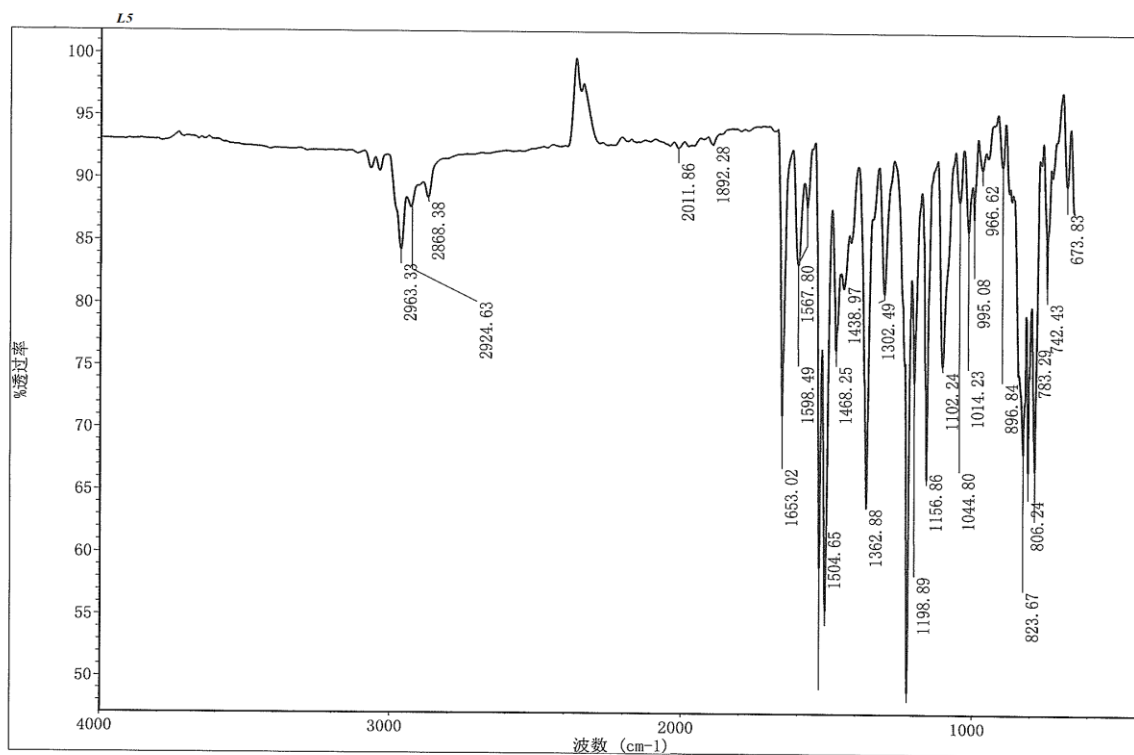

**Figure S21a** FTIR spectrum of ligand **L5**.

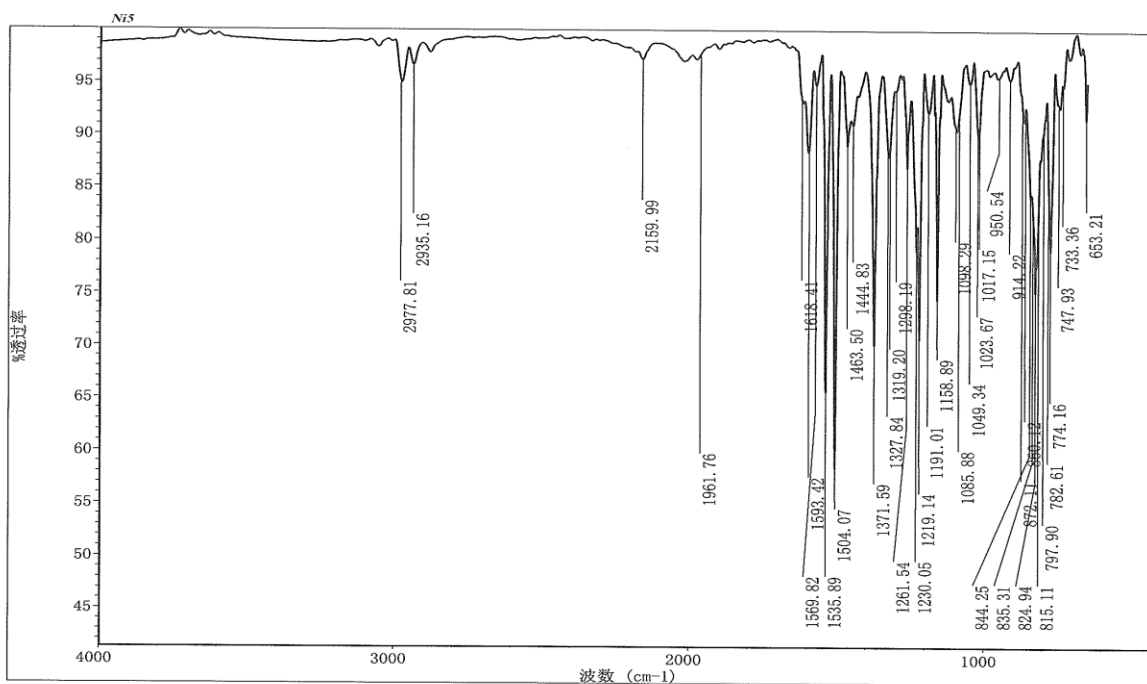

**Figure S21b** FTIR spectrum of complex **Ni5**.

**Table S1** Crystallographic data for **Ni3**·xH<sub>2</sub>O (x = 2,3), **Ni4** and **Ni5**.

|                                             | <b>Ni3</b> ·xH <sub>2</sub> O (x = 2,3)                                                                                            | <b>Ni4</b>                                                                                      | <b>Ni5</b>                                                                                      |
|---------------------------------------------|------------------------------------------------------------------------------------------------------------------------------------|-------------------------------------------------------------------------------------------------|-------------------------------------------------------------------------------------------------|
| Identification code                         |                                                                                                                                    |                                                                                                 |                                                                                                 |
| CCDC No.                                    | 2195148                                                                                                                            | 2195149                                                                                         | 2195150                                                                                         |
| Empirical formula                           | C <sub>117</sub> H <sub>109</sub> Br <sub>6</sub> N <sub>9</sub> Ni <sub>3</sub> O <sub>14</sub> ·3CH <sub>2</sub> Cl <sub>2</sub> | C <sub>39</sub> H <sub>27</sub> N <sub>3</sub> Br <sub>2</sub> O <sub>2</sub> F <sub>4</sub> Ni | C <sub>32</sub> H <sub>31</sub> N <sub>3</sub> Br <sub>2</sub> O <sub>2</sub> F <sub>2</sub> Ni |
| Formula weight                              | 2775.49                                                                                                                            | 864.16                                                                                          | 746.13                                                                                          |
| Temperature/K                               | 170.00(12)                                                                                                                         | 170.00(13)                                                                                      | 170.00(11)                                                                                      |
| Crystal system                              | monoclinic                                                                                                                         | triclinic                                                                                       | triclinic                                                                                       |
| Space group                                 | P2 <sub>1</sub> /n                                                                                                                 | P-1                                                                                             | P-1                                                                                             |
| a/Å                                         | 17.20860(10)                                                                                                                       | 11.9377(4)                                                                                      | 10.7461(2)                                                                                      |
| b/Å                                         | 21.93390(10)                                                                                                                       | 12.5497(4)                                                                                      | 11.2319(2)                                                                                      |
| c/Å                                         | 35.0020(2)                                                                                                                         | 16.0360(4)                                                                                      | 13.9891(2)                                                                                      |
| α/°                                         | 90                                                                                                                                 | 78.123(2)                                                                                       | 102.7970(10)                                                                                    |
| β/°                                         | 94.9920(10)                                                                                                                        | 71.397(3)                                                                                       | 105.9090(10)                                                                                    |
| γ/°                                         | 90                                                                                                                                 | 75.959(3)                                                                                       | 96.0270(10)                                                                                     |
| Volume/Å <sup>3</sup>                       | 13161.45(12)                                                                                                                       | 2187.23(12)                                                                                     | 1558.55(5)                                                                                      |
| Z                                           | 4                                                                                                                                  | 2                                                                                               | 2                                                                                               |
| ρ <sub>calc</sub> /cm <sup>3</sup>          | 1.401                                                                                                                              | 1.312                                                                                           | 1.590                                                                                           |
| μ/mm <sup>-1</sup>                          | 4.230                                                                                                                              | 3.201                                                                                           | 4.283                                                                                           |
| F(000)                                      | 5624.0                                                                                                                             | 864.0                                                                                           | 752.0                                                                                           |
| Crystal size/mm <sup>3</sup>                | 0.15 × 0.06 × 0.05                                                                                                                 | 0.15 × 0.1 × 0.06                                                                               | 0.4 × 0.3 × 0.2                                                                                 |
| Radiation                                   | Cu Kα (λ = 1.54184)                                                                                                                | Cu Kα (λ = 1.54184)                                                                             | Cu Kα (λ = 1.54184)                                                                             |
| 2θ range for data collection/°              | 5.542 to 150.778                                                                                                                   | 5.872 to 151.358                                                                                | 6.808 to 150.482                                                                                |
| Index ranges                                | -21 ≤ h ≤ 21, -22 ≤ k ≤ 27, -43 ≤ l ≤ 42                                                                                           | -14 ≤ h ≤ 14, -14 ≤ k ≤ 15, -15 ≤ l ≤ 19                                                        | -13 ≤ h ≤ 13, -14 ≤ k ≤ 14, -16 ≤ l ≤ 17                                                        |
| Reflections collected                       | 103711                                                                                                                             | 27525                                                                                           | 18282                                                                                           |
| Independent reflections                     | 26087 [R <sub>int</sub> = 0.0355, R <sub>sigma</sub> = 0.0301]                                                                     | 8656 [R <sub>int</sub> = 0.0577, R <sub>sigma</sub> = 0.0445]                                   | 6159 [R <sub>int</sub> = 0.0209, R <sub>sigma</sub> = 0.0161]                                   |
| Data/restraints/parameters                  | 26087/132/1525                                                                                                                     | 8656/0/461                                                                                      | 6159/0/384                                                                                      |
| Goodness-of-fit on F <sup>2</sup>           | 1.019                                                                                                                              | 1.073                                                                                           | 1.091                                                                                           |
| Final R indexes [I ≥ 2σ (I)]                | R <sub>1</sub> = 0.0397, wR <sub>2</sub> = 0.1028                                                                                  | R <sub>1</sub> = 0.0745, wR <sub>2</sub> = 0.2096                                               | R <sub>1</sub> = 0.0325, wR <sub>2</sub> = 0.0850                                               |
| Final R indexes [all data]                  | R <sub>1</sub> = 0.0445, wR <sub>2</sub> = 0.1059                                                                                  | R <sub>1</sub> = 0.0813, wR <sub>2</sub> = 0.2177                                               | R <sub>1</sub> = 0.0331, wR <sub>2</sub> = 0.0855                                               |
| Largest diff. peak/hole / e Å <sup>-3</sup> | 1.53/-1.94                                                                                                                         | 2.06/-1.74                                                                                      | 0.76/-0.89                                                                                      |

**Table S2**  $^{13}\text{C}$  NMR data of the polyethylene sample produced using **Ni4**/EtAlCl<sub>2</sub> at 30 °C (run 3, Table 3).

| Peak no. | Chemical shift (ppm) | Experimental integration | Peak no. | Chemical shift (ppm) | Experimental integration |
|----------|----------------------|--------------------------|----------|----------------------|--------------------------|
| 1        | 11.31                | 0.1                      | 18       | 30.48                | 1.4                      |
| 2        | 14.27                | 1                        | 19       | 31.68                | 0                        |
| 3        | 14.77                | 0.54                     | 20       | 32.23                | 0.97                     |
| 4        | 19.86                | 0.12                     | 21       | 32.72                | 0.44                     |
| 5        | 20.12                | 3.29                     | 22       | 33.22                | 2.4                      |
| 6        | 20.33                | 0                        | 23       | 33.57                | 0.42                     |
| 7        | 22.93                | 0.77                     | 24       | 33.83                | 0                        |
| 8        | 23.42                | 0                        | 25       | 34.01                | 0.63                     |
| 9        | 24.67                | 0                        | 26       | 34.5                 | 0.97                     |
| 10       | 26.72                | 0.3                      | 27       | 34.87                | 0.5                      |
| 11       | 27.26                | 1.72                     | 28       | 36.94                | 0                        |
| 12       | 27.44                | 5.74                     | 29       | 37.55                | 6.8                      |
| 13       | 27.83                | 0.73                     | 30       | 37.86                | 0                        |
| 14       | 29.53                | 1.24                     | 31       | 38.11                | 0.42                     |
| 15       | 29.61                | 2.62                     | 32       | 38.37                | 0                        |
| 16       | 30                   | 126.51                   | 33       | 39.62                | 0                        |
| 17       | 30.38                | 6.68                     |          |                      |                          |

**Table S3** Branching analysis for the polyethylene sample produced using **Ni4**/EtAlCl<sub>2</sub> at 30 °C (run 3, Table 3) [S5].

| Branching content   |         | Relative percentage (%) |
|---------------------|---------|-------------------------|
| N <sub>M</sub>      | 7.715   | 67.97                   |
| N <sub>E</sub>      | 0.33    | 2.90                    |
| N <sub>P</sub>      | 0.64    | 5.64                    |
| N <sub>B</sub>      | 0.5     | 4.40                    |
| N <sub>A</sub>      | 0       | 0                       |
| N <sub>M(1,4)</sub> | 0.75    | 6.61                    |
| N <sub>M(1,5)</sub> | 0       | 0                       |
| N <sub>M(1,6)</sub> | 0.435   | 3.83                    |
| N <sub>L</sub>      | 0.98    | 8.63                    |
| N <sub>L(1,4)</sub> | 0       | 0                       |
| [E]                 | 105.475 |                         |
| [R]                 | 11.35   | 100 %                   |
| Total branches      |         | <b>48/1000 Cs %</b>     |
| Methyl branches     |         | 78.41                   |
| Ethyl branches      |         | 2.91                    |
| Propyl branches     |         | 5.64                    |
| Butyl branches      |         | 4.41                    |
| Amyl branches       |         | 0                       |
| Longer branches     |         | 8.63                    |

**Table S4**  $^{13}\text{C}$  NMR data of the polyethylene sample with Ni4/MMAO at 30 °C (run 3, Table 4).

| Peak no. | Chemical shift (ppm) | Experimental integration | Peak no. | Chemical shift (ppm) | Experimental integration |
|----------|----------------------|--------------------------|----------|----------------------|--------------------------|
| 1        | 11.34                | 0.23                     | 18       | 30.49                | 4.06                     |
| 2        | 14.29                | 1                        | 19       | 31.68                | 0                        |
| 3        | 14.77                | 0                        | 20       | 32.24                | 0.9                      |
| 4        | 19.86                | 0                        | 21       | 32.72                | 0                        |
| 5        | 20.13                | 5.46                     | 22       | 33.22                | 4.29                     |
| 6        | 20.33                | 0                        | 23       | 33.52                | 0.68                     |
| 7        | 22.94                | 0.94                     | 24       | 33.83                | 0                        |
| 8        | 23.42                | 0                        | 25       | 34.01                | 0.79                     |
| 9        | 24.67                | 0                        | 26       | 34.49                | 3.32                     |
| 10       | 26.7                 | 0.21                     | 27       | 34.85                | 0.63                     |
| 11       | 27.25                | 3.98                     | 28       | 36.94                | 0.85                     |
| 12       | 27.44                | 10.81                    | 29       | 37.54                | 11.22                    |
| 13       | 27.83                | 0.94                     | 30       | 37.86                | 0                        |
| 14       | 29.53                | 1.3                      | 31       | 38.1                 | 0.68                     |
| 15       | 29.62                | 2.77                     | 32       | 38.37                | 0                        |
| 16       | 30                   | 174.11                   | 33       | 39.62                | 0.18                     |
| 17       | 30.38                | 10.66                    |          | -                    | -                        |

**Table S5** Branching analysis for the polyethylene sample produced using **Ni4**/MMAO at 30 °C (run 3, Table 4) [S5].

| Branching content   |         | Relative percentage (%) |
|---------------------|---------|-------------------------|
| N <sub>M</sub>      | 10.0125 | 75.61                   |
| N <sub>E</sub>      | 0.13    | 0.98                    |
| N <sub>P</sub>      | 0.85    | 6.42                    |
| N <sub>B</sub>      | 0.395   | 2.98                    |
| NA                  | 0       | 0                       |
| N <sub>M(1,4)</sub> | 0.485   | 3.66                    |
| N <sub>M(1,5)</sub> | 0       | 0                       |
| N <sub>M(1,6)</sub> | 0.47    | 3.55                    |
| N <sub>L</sub>      | 0.9     | 6.80                    |
| N <sub>L(1,4)</sub> | 0       | 0                       |
| [E]                 | 86.6    |                         |
| [R]                 | 13.2425 | 100%                    |
| Total branches      |         | <b>66/1000 Cs</b>       |
| Methyl branches     |         | 82.82                   |
| Ethyl branches      |         | 0.98                    |
| Propyl branches     |         | 6.42                    |
| Butyl branches      |         | 2.98                    |
| Amyl branches       |         | 0                       |
| Longer branches     |         | 6.80                    |

## References

- S1. Muller, T. E.; Hultsch, K. C.; Yus, M.; Foubelo, F.; Tada, M. Hydroamination: Direct Addition of Amines to Alkenes and Alkynes. *Chem. Rev.* **2008**, 108, 3795-3892.
- S2. Meiries, S.; Speck, K.; Cordes, D. B.; Slawin, A. M.; Nolan, S. P. [Pd(IPr\*<sup>OMe</sup>)(acac)Cl]: Tuning the N-Heterocyclic Carbene in Catalytic C–N Bond Formation. *Organometallics* **2013**, 32, 330-339.
- S3. Zhang, R.; Wang, Z.; Ma, Y.; Solan, G. A.; Sun, Y.; Sun, W.-H. *Dalton Trans.* **2019**, 48, 1878-1891.
- S4. Mahmood, Q.; Zeng, Y.; Wang, X.; Sun, Y.; W.-H. Sun. Advancing polyethylene properties by incorporating –NO<sub>2</sub> moiety in 1,2-bis(arylimino)acenaphthyllylnickel precatalysts: Synthesis, characterization and ethylene polymerization. *Dalton Trans.* **2017**, 46, 6934 – 6947.
- S5. Galland, G. B.; de Souza, R. F.; Mauler R. S.; Nunes F. F. <sup>13</sup>C NMR determination of the composition of linear low-density polyethylene obtained with [η<sup>3</sup>-methallyl-nickel-diimine] PF<sub>6</sub> complex. *Macromolecules* **1999**, 32, 1620-1625.
